# Supplementary material
Source: Research Square preprint supplement (doi:10.21203/rs.3.rs-9439065/v1)
Supplement: Supplementary file 1 [file 29960c2b7cdaec29ff65f8f4.docx]

**COMPREHENSIVE METHODOLOGICAL REPORT: BUSINESS INTELLIGENCE, KNOWLEDGE MANAGEMENT, AND INNOVATION IN MANUFACTURING SMEs**

**1. DATA FILES**

**1.1 Dataset Overview**

- **Final Sample Size**: 430 manufacturing SMEs
- **Data Type**: Cross-sectional survey data
- **Source**: Manufacturing SMEs across diverse subsectors
- **Geographic Coverage**: Not explicitly specified in the document

**1.2 Sampling Method and Data Collection**

- **Target Population**: Small and medium-sized enterprises in the manufacturing sector
- **Sampling Frame**: Manufacturing SMEs across multiple industry subsectors
- **Data Collection Method**: Cross-sectional survey design
- **Survey Administration**: Not explicitly detailed in the document

**1.3 Sample Composition**

**By Firm Size:**

- Micro enterprises (< 10 employees): 70 firms (16.2%)
- Small enterprises (10–49 employees): 220 firms (51.2%)
- Medium enterprises (50–249 employees): 140 firms (32.6%)

**By Firm Age:**

- < 10 years: 82 firms (19.1%)
- 10–20 years: 156 firms (36.3%)
- 21–30 years: 108 firms (25.1%)
- 30 years: 84 firms (19.5%)

**By Industry Subsector:**

- Food and beverages: 71 firms (16.5%)
- Textiles and apparel: 52 firms (12.1%)
- Chemicals and pharmaceuticals: 61 firms (14.2%)
- Plastics and rubber: 38 firms (8.8%)
- Machinery and equipment: 79 firms (18.4%)
- Electronics and electrical: 56 firms (13.0%)
- Automotive components: 43 firms (10.0%)
- Other manufacturing: 30 firms (7.0%)

**By IT Intensity:**

- Low (< 30% employees use computers): 98 firms (22.8%)
- Medium (30–60%): 187 firms (43.5%)
- High (> 60%): 145 firms (33.7%)

**1.4 Data Cleaning and Processing**

The document does not provide explicit details about:

- Missing data handling procedures
- Outlier detection and treatment
- Data validation protocols
- Response rate or non-response bias assessment

**1.5 Processed/Transformed Datasets**

**Variable Transformations:**

- **Firm Size**: Logarithmic transformation applied (log transformation)
- **Firm Age**: Logarithmic transformation applied (log transformation)
- **Interaction Terms**: Created for moderation analysis (KM × DDDM)

**2. SURVEY INSTRUMENTS AND PROTOCOLS**

**2.1 Measurement Scale**

- **Scale Type**: Likert scale (specific range not explicitly stated, but descriptive statistics suggest 7-point scale based on means and standard deviations)
- **Instrument Source**: Adapted from validated scales (specific source citations not provided in extracted text)

**2.2 Constructs and Items**

**2.2.1 Business Intelligence (BI) Capabilities**

- **Total Items**: 12 items
- **Dimensions**: Three-dimensional construct
  - **Data Capture**: 4 items
  - **Analytics**: 4 items
  - **Interpretation**: 4 items
- **Cronbach's α**: 0.93 (overall)
- **Composite Reliability**: 0.94
- **Average Variance Extracted (AVE)**: 0.68
- **Descriptive Statistics**: Mean = 4.82, SD = 1.24

**Sub-dimension Reliability:**

- Data Capture: α = 0.89, CR = 0.90, AVE = 0.69, M = 4.91, SD = 1.31
- Analytics: α = 0.91, CR = 0.92, AVE = 0.74, M = 4.68, SD = 1.29
- Interpretation: α = 0.90, CR = 0.91, AVE = 0.71, M = 4.87, SD = 1.26

**2.2.2 Knowledge Management (KM) Capability**

- **Total Items**: 10 items
- **Dimensions**: Two-dimensional construct
  - **Knowledge Sharing**: 5 items
  - **Absorptive Capacity**: 5 items
- **Cronbach's α**: 0.92 (overall)
- **Composite Reliability**: 0.93
- **Average Variance Extracted (AVE)**: 0.66
- **Descriptive Statistics**: Mean = 5.03, SD = 1.18

**Sub-dimension Reliability:**

- Knowledge Sharing: α = 0.90, CR = 0.91, AVE = 0.67, M = 5.12, SD = 1.22
- Absorptive Capacity: α = 0.89, CR = 0.90, AVE = 0.64, M = 4.94, SD = 1.21

**2.2.3 Innovation Performance**

- **Total Items**: 8 items
- **Dimensions**: Two-dimensional construct
  - **Product Innovation**: 4 items
  - **Process Innovation**: 4 items
- **Cronbach's α**: 0.94 (overall)
- **Composite Reliability**: 0.95
- **Average Variance Extracted (AVE)**: 0.70
- **Descriptive Statistics**: Mean = 4.76, SD = 1.33

**Sub-dimension Reliability:**

- Product Innovation: α = 0.92, CR = 0.93, AVE = 0.73, M = 4.69, SD = 1.38
- Process Innovation: α = 0.91, CR = 0.92, AVE = 0.74, M = 4.83, SD = 1.35

**2.2.4 Data-Driven Decision Making (DDDM) Culture**

- **Total Items**: 6 items
- **Cronbach's α**: 0.91
- **Composite Reliability**: 0.92
- **Average Variance Extracted (AVE)**: 0.68
- **Descriptive Statistics**: Mean = 4.58, SD = 1.41

**2.3 Instrument Validation**

**Reliability Assessment:**

- All constructs exceeded the recommended threshold of 0.70 for Cronbach's α
- Composite Reliability values ranged from 0.90 to 0.95, exceeding the 0.70 threshold

**Validity Assessment:**

- **Convergent Validity**: AVE values ranged from 0.64 to 0.74, all exceeding the 0.50 threshold
- **Discriminant Validity**: Square root of AVE (shown in parentheses on correlation matrix diagonal) exceeded inter-construct correlations
- **Confirmatory Factor Analysis**: Conducted but detailed results not fully presented in extracted text

**2.4 Data Collection Procedures**

The document does not provide detailed protocols for:

- Survey administration method (online, paper-based, interview)
- Time frame for data collection
- Follow-up procedures
- Respondent characteristics (e.g., job titles, roles)

**3. VARIABLE DETAILS**

**3.1 Independent Variable**

**Business Intelligence (BI) Capabilities**

- **Type**: Independent variable
- **Measurement**: Second-order reflective construct with three first-order dimensions
- **Scale**: Multi-item Likert scale (12 items total)
- **Operationalization**:
  - Data Capture capability (4 items)
  - Analytics capability (4 items)
  - Interpretation capability (4 items)
- **Coding**: Higher scores indicate greater BI capabilities
- **Transformations**: None applied to the main construct

**3.2 Dependent Variable**

**Innovation Performance**

- **Type**: Dependent variable
- **Measurement**: Second-order reflective construct with two first-order dimensions
- **Scale**: Multi-item Likert scale (8 items total)
- **Operationalization**:
  - Product Innovation (4 items): Development and implementation of new products
  - Process Innovation (4 items): Development and implementation of new processes
- **Coding**: Higher scores indicate better innovation performance
- **Transformations**: None applied to the main construct

**3.3 Mediating Variable**

**Knowledge Management (KM) Capability**

- **Type**: Mediating variable
- **Measurement**: Second-order reflective construct with two first-order dimensions
- **Scale**: Multi-item Likert scale (10 items total)
- **Operationalization**:
  - Knowledge Sharing (5 items)
  - Absorptive Capacity (5 items)
- **Coding**: Higher scores indicate greater KM capability
- **Transformations**: None applied to the main construct
- **Mediating Role**: Mediates the relationship between BI capabilities and innovation performance

**3.4 Moderating Variable**

**Data-Driven Decision Making (DDDM) Culture**

- **Type**: Moderating variable
- **Measurement**: Single-order reflective construct
- **Scale**: Multi-item Likert scale (6 items)
- **Operationalization**: Organizational culture that prioritizes data-driven decision making
- **Coding**: Higher scores indicate stronger DDDM culture
- **Transformations**: Interaction term created (KM × DDDM) for moderation analysis
- **Moderating Role**: Moderates the relationship between KM capability and innovation performance

**3.5 Control Variables**

**1. Firm Size**

- **Measurement**: Number of employees
- **Categories**:
  - Micro: < 10 employees
  - Small: 10–49 employees
  - Medium: 50–249 employees
- **Transformation**: Logarithmic transformation applied [log(Firm Size)]
- **Rationale**: Control for resource availability and organizational complexity
- **Effect on Innovation**: β = 0.09, p = 0.032 (significant positive effect)

**2. Firm Age**

- **Measurement**: Years since establishment
- **Categories**:
  - < 10 years
  - 10–20 years
  - 21–30 years
  - 30 years
- **Transformation**: Logarithmic transformation applied [log(Firm Age)]
- **Rationale**: Control for organizational maturity and experience
- **Effect on Innovation**: β = 0.02, p = 0.598 (non-significant)

**3. IT Intensity**

- **Measurement**: Percentage of employees using computers
- **Categories**:
  - Low: < 30%
  - Medium: 30–60%
  - High: > 60%
- **Transformation**: None explicitly stated
- **Rationale**: Control for technological infrastructure and digital readiness
- **Effect on Innovation**: β = 0.08, p = 0.051 (marginally non-significant)

**4. Prior Innovation**

- **Measurement**: Not explicitly detailed in extracted text
- **Rationale**: Control for historical innovation performance
- **Effect on Innovation**: β = 0.24, p < 0.001 (significant positive effect)

**3.6 Interaction Terms**

**KM × DDDM**

- **Purpose**: Test moderation effect of DDDM on the KM-Innovation relationship
- **Creation Method**: Multiplicative interaction term
- **Centering**: Not explicitly stated (typically mean-centered)
- **Effect**: β = 0.16, p < 0.001 (significant positive interaction)

**4. ANALYSIS RESOURCES**

**4.1 Statistical Software**

- **Primary Software**: AMOS 26.0
- **Purpose**: Structural equation modeling (SEM) analysis
- **Additional Software**: Not explicitly mentioned (likely SPSS for preliminary analyses)

**4.2 Analytical Methods**

**4.2.1 Structural Equation Modeling (SEM)**

**Model Specification:**

- Full structural model with latent variables
- Second-order constructs for BI, KM, and Innovation Performance
- Direct and indirect paths specified

**Estimation Method:**

- Maximum likelihood estimation (implied, standard for AMOS)

**Model Fit Indices:** The structural model demonstrated excellent fit:

- **χ²/df ratio**: 2.14 (< 3.0 threshold for good fit)
- **Comparative Fit Index (CFI)**: 0.96 (> 0.95 threshold for excellent fit)
- **Tucker-Lewis Index (TLI)**: 0.95 (> 0.95 threshold for excellent fit)
- **Root Mean Square Error of Approximation (RMSEA)**: 0.052 (< 0.06 threshold for good fit)
- **Standardized Root Mean Square Residual (SRMR)**: 0.041 (< 0.08 threshold for good fit)

**4.2.2 Mediation Analysis**

**Method**: Bootstrapping procedure **Parameters:**

- **Number of Bootstrap Resamples**: 5,000
- **Confidence Interval**: 95% bias-corrected confidence intervals
- **Mediation Type Tested**: Full mediation

**Results:**

- **Direct Effect** (BI → Innovation): β = 0.28, p < 0.001, 95% CI [0.18, 0.38]
- **Indirect Effect** (BI → KM → Innovation): β = 0.30, p < 0.001, 95% CI [0.22, 0.38]
- **Proportion of Total Effect Mediated**: 40.4% (calculated from indirect effect)
- **Individual Paths**:
  - BI → KM: β = 0.67, p < 0.001, 95% CI [0.58, 0.76]
  - KM → Innovation: β = 0.45, p < 0.001, 95% CI [0.34, 0.56]

**4.2.3 Moderation Analysis**

**Method**: Interaction term approach in SEM **Moderator**: DDDM Culture **Moderated Path**: KM → Innovation

**Results:**

- **Interaction Effect** (KM × DDDM → Innovation): β = 0.16, p < 0.001, 95% CI [0.07, 0.25]
- **Interpretation**: The positive effect of KM on innovation is stronger in firms with higher DDDM culture

**4.2.4 Moderated Mediation Analysis**

**Method**: Conditional indirect effects analysis via bootstrapping **Parameters:**

- Bootstrap resamples: 5,000 (same as mediation analysis)
- Confidence intervals: 95% bias-corrected

**Results:**

- **Moderated Mediation Index**: 0.11, p < 0.01, 95% CI [0.05, 0.18]
- **Interpretation**: DDDM amplifies the indirect effect of BI on innovation through KM

**4.3 Preliminary Analyses**

**4.3.1 Reliability Analysis**

- **Method**: Cronbach's alpha calculation
- **Threshold**: α > 0.70 for acceptable reliability
- **Results**: All constructs exceeded threshold (range: 0.89–0.94)

**4.3.2 Validity Testing**

**Convergent Validity:**

- **Method**: Average Variance Extracted (AVE)
- **Threshold**: AVE > 0.50
- **Results**: All constructs exceeded threshold (range: 0.64–0.74)

**Discriminant Validity:**

- **Method**: Fornell-Larcker criterion (square root of AVE compared to correlations)
- **Results**: Square root of AVE exceeded all inter-construct correlations

**4.3.3 Correlation Analysis**

- **Method**: Pearson correlation coefficients
- **Purpose**: Examine bivariate relationships among variables
- **Results**: All main constructs significantly correlated (r = 0.54 to 0.67, p < 0.001)

**4.4 Statistical Formulae and Procedures**

**Mediation Effect Calculation:**

- Indirect Effect = (Path BI → KM) × (Path KM → Innovation)
- Indirect Effect = 0.67 × 0.45 = 0.30 (approximately)

**Moderated Mediation:**

- Conditional Indirect Effect = (Path BI → KM) × [(Path KM → Innovation) + (Interaction KM × DDDM × DDDM value)]
- Index of Moderated Mediation tests whether indirect effect varies across moderator levels

**Control Variable Adjustment:**

- All paths estimated while controlling for firm size, firm age, IT intensity, and prior innovation

**4.5 Missing Data and Assumptions**

The document does not explicitly detail:

- Missing data handling procedures
- Normality testing procedures
- Multicollinearity diagnostics
- Homoscedasticity assessment

**5. SUPPORTING DOCUMENTATION**

**5.1 Reliability and Validity Tables**

**Table 2: Construct Reliability and Validity** This table provides comprehensive psychometric properties:

- Cronbach's alpha coefficients
- Composite reliability (CR) values
- Average variance extracted (AVE)
- Descriptive statistics (means and standard deviations)
- All constructs and sub-dimensions

**5.2 Correlation Matrix**

**Table 3: Descriptive Statistics and Correlations** This table presents:

- Bivariate correlations among all constructs
- Diagonal values showing square root of AVE (in parentheses)
- Correlations with control variables
- Significance levels (*, **, ***)
- Evidence for discriminant validity****

**Key Correlations:**

- BI Capabilities ↔ KM Capability: r = 0.64***
- BI Capabilities ↔ Innovation Performance: r = 0.58***
- KM Capability ↔ Innovation Performance: r = 0.67***
- DDDM Culture ↔ Innovation Performance: r = 0.54***

**5.3 Hypothesis Testing Results**

**Table 4: Structural Model Results** This table provides:

- Standardized path coefficients (β)
- Standard errors (SE)
- t-values
- p-values
- 95% confidence intervals
- Support status for each hypothesis
- Control variable effects

**5.4 Model Fit Indices**

Reported in text:

- χ²/df = 2.14
- CFI = 0.96
- TLI = 0.95
- RMSEA = 0.052
- SRMR = 0.041

**5.5 Confirmatory Factor Analysis (CFA)**

**Mentioned but not fully detailed:**

- CFA was conducted to validate the measurement model
- Results confirmed adequate fit and factor loadings
- Specific factor loadings and modification indices not provided in extracted text

**5.6 Common Method Bias Testing**

The document mentions that common method bias was addressed but does not provide:

- Specific test used (e.g., Harman's single-factor test, common latent factor method)
- Results of the test
- Procedural or statistical remedies employed

**5.7 Additional Supporting Materials**

**Sample Characteristics (Table 1):**

- Detailed breakdown of sample composition
- Firm size distribution
- Firm age distribution
- Industry subsector representation
- IT intensity levels

**5.8 Materials Not Explicitly Documented**

The following supporting materials are not detailed in the extracted text:

- Full questionnaire items
- Factor loading tables from CFA
- Modification indices
- Residual covariance matrices
- Detailed common method bias test results
- Sensitivity analyses
- Post-hoc power analysis

**6. ETHICAL APPROVAL**

**6.1 Institutional Review and Approval**

**Status**: Not explicitly documented in the extracted text

The document does not provide:

- Name of institutional review board (IRB) or ethics committee
- Ethics approval number or reference
- Date of approval
- Institution name granting approval

**6.2 Ethical Guidelines and Regulations**

**Status**: Not explicitly documented in the extracted text

The document does not specify:

- Specific ethical guidelines followed (e.g., Declaration of Helsinki, Belmont Report)
- National or international regulations adhered to
- Professional association codes of conduct
- Data protection regulations (e.g., GDPR, local data protection laws)

**6.3 Informed Consent**

**Status**: Not explicitly documented in the extracted text

The document does not detail:

- Whether informed consent was obtained
- Consent procedure (written, verbal, electronic)
- Information provided to participants
- Voluntary participation assurances
- Right to withdraw

**6.4 Anonymity and Confidentiality**

**Status**: Not explicitly documented in the extracted text

The document does not specify:

- Anonymization procedures
- Confidentiality protections
- Data storage and security measures
- Access restrictions
- Data retention policies

**6.5 Data Protection**

**Status**: Not explicitly documented in the extracted text

The document does not detail:

- Data protection measures
- Participant privacy safeguards
- Secure data handling protocols
- Compliance with data protection regulations

**6.6 Publisher's Disclaimer**

**Noted**: The document includes an MDPI publisher's disclaimer stating:

"The statements, opinions and data contained in all publications are solely those of the individual author(s) and contributor(s) and not of MDPI and/or the editor(s). MDPI and/or the editor(s) disclaim responsibility for any injury to people or property resulting from any ideas, methods, instructions or products referred to in the content."

This standard disclaimer does not constitute ethical approval documentation.

**7. SUMMARY AND GAPS IN DOCUMENTATION**

**7.1 Well-Documented Areas**

✓ Sample composition and characteristics ✓ Measurement instruments (number of items, reliability, validity) ✓ Statistical analysis procedures (SEM, mediation, moderation) ✓ Model fit indices and hypothesis testing results ✓ Variable operationalization and transformations ✓ Correlation matrices and descriptive statistics

**7.2 Gaps and Missing Information**

✗ Specific questionnaire items and wording ✗ Detailed data collection protocols and procedures ✗ Response rate and non-response bias assessment ✗ Missing data handling procedures ✗ Common method bias testing details ✗ Full CFA results (factor loadings, modification indices) ✗ Ethical approval documentation ✗ Informed consent procedures ✗ Data protection and anonymization protocols ✗ Geographic location of sample ✗ Time frame for data collection ✗ Respondent characteristics (job titles, roles)

**7.3 Reproducibility Assessment**

**High Reproducibility:**

- Statistical analyses can be replicated with reported parameters
- Measurement scales can be reconstructed from reliability/validity tables
- Sample characteristics are well-documented

**Moderate Reproducibility:**

- Data collection procedures would need clarification
- Specific questionnaire items not provided
- Some analytical decisions not fully explained

**Low Reproducibility:**

- Original data access not addressed
- Ethical approval process not documented
- Geographic and temporal context limited

**8. THEORETICAL FRAMEWORK**

**8.1 Theoretical Foundations**

The study integrates three theoretical perspectives:

1. **Resource-Based View (RBV)**
   - BI capabilities as strategic organizational resources
2. **Knowledge-Based View (KBV)**
   - Knowledge management as critical organizational capability
3. **Dynamic Capabilities Theory**
   - Organizational ability to adapt and innovate through BI and KM

**8.2 Conceptual Model**

The study proposes and tests a moderated mediation model:

- **Independent Variable**: BI Capabilities
- **Mediator**: KM Capability
- **Moderator**: DDDM Culture
- **Dependent Variable**: Innovation Performance
- **Controls**: Firm size, firm age, IT intensity, prior innovation

**CONCLUSION**

This report provides a comprehensive extraction and synthesis of methodological information from the research document on business intelligence, knowledge management, and innovation in manufacturing SMEs. The study demonstrates rigorous quantitative methodology with robust sample size (N = 430), validated measurement instruments (all α > 0.89), and sophisticated analytical techniques (SEM with bootstrapped mediation/moderation).

The findings provide strong empirical support for the mediating role of knowledge management in the BI-innovation relationship (40.4% of total effect) and the amplifying effect of data-driven decision-making culture (moderated mediation index = 0.11), with excellent model fit across all standard SEM indices.
