# Supplementary material
Source: Research Square preprint supplement (doi:10.21203/rs.3.rs-9439065/v1)
Supplement: Supplementary file 2 [file 5d79018061ba6934c4d6de68.docx]

**Survey Instruments and Protocols: Full Documentation of Questionnaires and Data Collection Procedures**

**Research Study:** Can Business Intelligence Make Small Businesses More Innovative?

**Study Focus:** Understanding the Role of Knowledge Management and Data-Driven Decision Making in Manufacturing SMEs

**Table of Contents**

1. [Overview of Survey Design](https://scispace.com/chat/791cb888-ed9b-4160-94d2-50d2d5a802c4)
2. [Target Population and Sampling](https://scispace.com/chat/791cb888-ed9b-4160-94d2-50d2d5a802c4)
3. [Questionnaire Structure](https://scispace.com/chat/791cb888-ed9b-4160-94d2-50d2d5a802c4)
4. [Scale Sources and Adaptation](https://scispace.com/chat/791cb888-ed9b-4160-94d2-50d2d5a802c4)
5. [Data Collection Procedure](https://scispace.com/chat/791cb888-ed9b-4160-94d2-50d2d5a802c4)
6. [Instrument Validation](https://scispace.com/chat/791cb888-ed9b-4160-94d2-50d2d5a802c4)
7. [References](https://scispace.com/chat/791cb888-ed9b-4160-94d2-50d2d5a802c4)

**1. Overview of Survey Design**

**1.1 Research Design**

This study employed a **cross-sectional survey design** to investigate the relationships among business intelligence capabilities, knowledge management capability, data-driven decision-making culture, and innovation performance in manufacturing small and medium-sized enterprises (SMEs). The cross-sectional approach enabled the collection of data from a large sample of firms at a single point in time, facilitating the examination of relationships among constructs while controlling for firm-level characteristics.

**1.2 Survey Instrument Type**

The survey utilized a **self-administered structured questionnaire** designed to capture quantitative data on organizational capabilities, cultural attributes, and innovation outcomes. The structured format ensured consistency across respondents and facilitated systematic data analysis through statistical modeling techniques.

**1.3 Administration Modes**

The questionnaire was administered through **dual modes** to maximize response rates and accommodate respondent preferences:

- **Online Mode:** A web-based survey platform was deployed to enable electronic completion, offering convenience and automated data capture. The online version included built-in validation checks to minimize missing data and response errors.
- **Paper-Based Mode:** Traditional paper questionnaires were provided to firms that preferred or required physical documentation. This mode ensured accessibility for organizations with limited digital infrastructure or respondents who preferred tangible survey materials.

The dual-mode approach enhanced sample representativeness by accommodating diverse technological capabilities and preferences across the manufacturing SME population.

**1.4 Survey Length and Completion Time**

The questionnaire comprised **46 substantive items** across four main constructs, plus additional items capturing control variables and demographic information. The estimated completion time was approximately 15–20 minutes, balancing comprehensiveness with respondent burden to maintain data quality and response rates.

**2. Target Population and Sampling**

**2.1 Target Population**

The target population consisted of **manufacturing small and medium-sized enterprises (SMEs)** operating across diverse manufacturing subsectors. Manufacturing SMEs were selected as the focal population due to their critical role in industrial innovation, their distinctive resource constraints, and the increasing relevance of business intelligence and knowledge management capabilities in competitive manufacturing environments.

**Population Characteristics:**

- **Firm Size:** Enterprises with fewer than 250 employees, categorized as:
  - Micro enterprises: < 10 employees
  - Small enterprises: 10–49 employees
  - Medium enterprises: 50–249 employees
- **Industry Sector:** Manufacturing firms across multiple subsectors including food and beverages, textiles and apparel, chemicals and pharmaceuticals, plastics and rubber, machinery and equipment, electronics and electrical, automotive components, and other manufacturing activities
- **Geographic Scope:** Manufacturing SMEs within the study region (specific geographic boundaries not detailed in source documents)

**2.2 Sampling Strategy**

A **stratified random sampling** approach was employed to ensure adequate representation across key firm characteristics and industry subsectors. This sampling strategy enhanced the generalizability of findings and enabled subgroup analyses while maintaining statistical efficiency.

**Stratification Criteria:**

1. **Firm Size:** Proportional allocation across micro, small, and medium enterprise categories
2. **Industry Subsector:** Representation across major manufacturing subsectors to capture industry-specific variations
3. **IT Intensity:** Consideration of technological infrastructure levels (low, medium, high IT intensity)

The stratified approach ensured that the final sample reflected the heterogeneity of the manufacturing SME population, reducing sampling bias and enhancing the external validity of findings.

**2.3 Key Informants and Respondent Selection**

To ensure data quality and validity, the study employed a **key informant approach**, targeting respondents with direct knowledge of the firm's business intelligence systems, knowledge management practices, and innovation activities.

**Eligible Key Informants:**

- **Owner-Managers:** Individuals with ownership stakes and managerial responsibilities, possessing comprehensive knowledge of organizational capabilities and strategic initiatives
- **Senior Managers:** Top-level executives (e.g., General Managers, Operations Directors) with organization-wide visibility and decision-making authority
- **IT Managers/Chief Information Officers:** Technology leaders with direct oversight of business intelligence systems, data infrastructure, and information technology capabilities
- **Innovation Managers/R&D Directors:** Individuals responsible for innovation initiatives and new product/process development activities

**Selection Criteria:**

- Direct involvement in or oversight of business intelligence implementation and utilization
- Knowledge of organizational knowledge management practices and information sharing mechanisms
- Awareness of the firm's innovation activities and performance outcomes
- Minimum of one year in current role to ensure adequate organizational familiarity

The key informant approach minimized measurement error by ensuring that respondents possessed the requisite knowledge to provide accurate assessments of organizational capabilities and performance.

**2.4 Eligibility Criteria**

Firms were eligible for inclusion in the study if they met the following criteria:

1. **Size Criterion:** Employed fewer than 250 full-time equivalent employees, consistent with standard SME definitions
2. **Sector Criterion:** Operated primarily in manufacturing activities (production of tangible goods)
3. **Operational Status:** Active business operations for at least two years, ensuring organizational stability and sufficient time for capability development
4. **BI/KM Relevance:** Some level of engagement with business intelligence systems or knowledge management practices, ranging from basic data collection to advanced analytics capabilities
5. **Respondent Availability:** Willingness of a qualified key informant to participate in the survey

**2.5 Final Sample Composition**

The final sample comprised **430 manufacturing SMEs** that completed the survey and met all eligibility criteria. The sample demonstrated strong representation across firm characteristics:

**By Firm Size:**

- Micro enterprises (< 10 employees): 70 firms (16.2%)
- Small enterprises (10–49 employees): 220 firms (51.2%)
- Medium enterprises (50–249 employees): 140 firms (32.6%)

**By Firm Age:**

- < 10 years: 82 firms (19.1%)
- 10–20 years: 156 firms (36.3%)
- 21–30 years: 108 firms (25.1%)
- 30 years: 84 firms (19.5%)

**By Industry Subsector:**

- Food and beverages: 71 firms (16.5%)
- Textiles and apparel: 52 firms (12.1%)
- Chemicals and pharmaceuticals: 61 firms (14.2%)
- Plastics and rubber: 38 firms (8.8%)
- Machinery and equipment: 79 firms (18.4%)
- Electronics and electrical: 56 firms (13.0%)
- Automotive components: 43 firms (10.0%)
- Other manufacturing: 30 firms (7.0%)

**By IT Intensity:**

- Low (< 30% employees use computers): 98 firms (22.8%)
- Medium (30–60%): 187 firms (43.5%)
- High (> 60%): 145 firms (33.7%)

This diverse sample composition enhanced the generalizability of findings across the manufacturing SME population and enabled robust statistical analyses.

**3. Questionnaire Structure**

The questionnaire was organized into six main sections, progressing from organizational capabilities to innovation outcomes, followed by control variables and demographic information. All substantive items measuring the four main constructs employed a **7-point Likert scale** ranging from **1 = Strongly Disagree** to **7 = Strongly Agree**, enabling fine-grained measurement of respondent perceptions and organizational attributes.

**3.1 Business Intelligence (BI) Capabilities**

**Construct Definition:** BI capabilities represent the organizational capacity to capture, analyze, and interpret data to support decision-making and strategic actions. This multidimensional construct encompasses the technological infrastructure, analytical competencies, and interpretive skills necessary to transform raw data into actionable business intelligence.

**Total Items:** 12 items **Measurement Scale:** 7-point Likert scale (1 = Strongly Disagree to 7 = Strongly Agree) **Construct Structure:** Second-order reflective construct with three first-order dimensions

**3.1.1 Data Capture Sub-Scale (4 items)**

This dimension assesses the firm's ability to systematically collect, integrate, and store data from internal and external sources.

**Sample Items:**

1. "Our organization has effective systems for capturing data from various business operations."
2. "We systematically collect data from customers, suppliers, and market sources."
3. "Our data capture systems integrate information from different functional areas."
4. "We maintain comprehensive databases that store relevant business information."

**Psychometric Properties:**

- Cronbach's α: 0.89
- Composite Reliability: 0.90
- Average Variance Extracted (AVE): 0.69
- Mean: 4.91, Standard Deviation: 1.31

**3.1.2 Analytics Sub-Scale (4 items)**

This dimension measures the firm's capacity to process, analyze, and model data using analytical tools and techniques.

**Sample Items:**

1. "Our organization uses analytical tools to examine patterns and trends in business data."
2. "We have the capability to perform advanced data analysis to support decision-making."
3. "Our analytical systems help us identify relationships and correlations in our data."
4. "We effectively use data analytics to generate insights about our business performance."

**Psychometric Properties:**

- Cronbach's α: 0.91
- Composite Reliability: 0.92
- Average Variance Extracted (AVE): 0.74
- Mean: 4.68, Standard Deviation: 1.29

**3.1.3 Interpretation Sub-Scale (4 items)**

This dimension evaluates the firm's ability to interpret analytical results, derive meaningful insights, and translate data into actionable knowledge.

**Sample Items:**

1. "Our managers are skilled at interpreting the results of data analyses."
2. "We effectively translate data insights into actionable business strategies."
3. "Our organization has the expertise to understand the implications of analytical findings."
4. "We can effectively communicate data-driven insights across the organization."

**Psychometric Properties:**

- Cronbach's α: 0.90
- Composite Reliability: 0.91
- Average Variance Extracted (AVE): 0.71
- Mean: 4.87, Standard Deviation: 1.26

**Overall BI Capabilities Construct:**

- Cronbach's α: 0.93
- Composite Reliability: 0.94
- Average Variance Extracted (AVE): 0.68
- Mean: 4.82, Standard Deviation: 1.24

**3.2 Knowledge Management (KM) Capability**

**Construct Definition:** KM capability represents the organizational capacity to create, share, integrate, and apply knowledge to enhance organizational performance. This construct encompasses both the social processes of knowledge sharing and the organizational capacity to absorb and utilize external knowledge.

**Total Items:** 10 items **Measurement Scale:** 7-point Likert scale (1 = Strongly Disagree to 7 = Strongly Agree) **Construct Structure:** Second-order reflective construct with two first-order dimensions

**3.2.1 Knowledge Sharing Sub-Scale (5 items)**

This dimension assesses the extent to which organizational members share knowledge, expertise, and insights across functional and hierarchical boundaries.

**Sample Items:**

1. "Employees in our organization regularly share their knowledge and expertise with colleagues."
2. "Our organization has effective mechanisms for transferring knowledge across departments."
3. "Knowledge sharing is encouraged and rewarded in our organizational culture."
4. "We have formal and informal channels that facilitate knowledge exchange among employees."
5. "Experienced employees actively mentor and share their knowledge with newer staff members."

**Psychometric Properties:**

- Cronbach's α: 0.90
- Composite Reliability: 0.91
- Average Variance Extracted (AVE): 0.67
- Mean: 5.12, Standard Deviation: 1.22

**3.2.2 Absorptive Capacity Sub-Scale (5 items)**

This dimension measures the firm's ability to recognize, assimilate, and apply external knowledge from customers, suppliers, competitors, and other external sources.

**Sample Items:**

1. "Our organization actively seeks and acquires knowledge from external sources."
2. "We have the ability to recognize the value of new external knowledge for our business."
3. "Our organization effectively assimilates external knowledge into our operations."
4. "We can quickly apply new external knowledge to solve business problems."
5. "Our employees have the skills to integrate external knowledge with our existing knowledge base."

**Psychometric Properties:**

- Cronbach's α: 0.89
- Composite Reliability: 0.90
- Average Variance Extracted (AVE): 0.64
- Mean: 4.94, Standard Deviation: 1.21

**Overall KM Capability Construct:**

- Cronbach's α: 0.92
- Composite Reliability: 0.93
- Average Variance Extracted (AVE): 0.66
- Mean: 5.03, Standard Deviation: 1.18

**3.3 Innovation Performance**

**Construct Definition:** Innovation performance represents the firm's success in developing and implementing new products and processes that enhance competitive advantage and organizational effectiveness. This construct captures both product-related and process-related innovation outcomes.

**Total Items:** 8 items **Measurement Scale:** 7-point Likert scale (1 = Strongly Disagree to 7 = Strongly Agree) **Construct Structure:** Second-order reflective construct with two first-order dimensions

**3.3.1 Product Innovation Sub-Scale (4 items)**

This dimension assesses the firm's performance in developing and introducing new or significantly improved products to the market.

**Sample Items:**

1. "Our organization has successfully introduced new products to the market in recent years."
2. "We regularly develop products that are new to our industry or market."
3. "Our new products have been well-received by customers and achieved commercial success."
4. "We have a strong track record of product innovation compared to our competitors."

**Psychometric Properties:**

- Cronbach's α: 0.92
- Composite Reliability: 0.93
- Average Variance Extracted (AVE): 0.73
- Mean: 4.69, Standard Deviation: 1.38

**3.3.2 Process Innovation Sub-Scale (4 items)**

This dimension measures the firm's performance in developing and implementing new or significantly improved production processes, delivery methods, or operational procedures.

**Sample Items:**

1. "Our organization has successfully implemented new production processes or technologies."
2. "We regularly improve our operational processes to enhance efficiency and quality."
3. "Our process innovations have resulted in significant cost reductions or quality improvements."
4. "We are ahead of our competitors in adopting innovative operational practices."

**Psychometric Properties:**

- Cronbach's α: 0.91
- Composite Reliability: 0.92
- Average Variance Extracted (AVE): 0.74
- Mean: 4.83, Standard Deviation: 1.35

**Overall Innovation Performance Construct:**

- Cronbach's α: 0.94
- Composite Reliability: 0.95
- Average Variance Extracted (AVE): 0.70
- Mean: 4.76, Standard Deviation: 1.33

**3.4 Data-Driven Decision Making (DDDM) Culture**

**Construct Definition:** DDDM culture represents the extent to which the organization values, prioritizes, and systematically uses data and analytical evidence in decision-making processes. This construct captures the cultural norms, values, and practices that support evidence-based management.

**Total Items:** 6 items **Measurement Scale:** 7-point Likert scale (1 = Strongly Disagree to 7 = Strongly Agree) **Construct Structure:** Single-order reflective construct

**Sample Items:**

1. "In our organization, decisions are typically based on data and analytical evidence rather than intuition."
2. "Our organizational culture strongly emphasizes the use of data in decision-making."
3. "Managers are expected to support their recommendations with data and analysis."
4. "We have established processes that require data-driven justification for major decisions."
5. "Data and facts are valued more highly than opinions and gut feelings in our decision-making."
6. "Our leadership actively promotes and models data-driven decision-making behaviors."

**Psychometric Properties:**

- Cronbach's α: 0.91
- Composite Reliability: 0.92
- Average Variance Extracted (AVE): 0.68
- Mean: 4.58, Standard Deviation: 1.41

**3.5 Control Variables**

To account for alternative explanations and enhance the internal validity of findings, the questionnaire included items measuring four control variables known to influence innovation performance in SMEs.

**3.5.1 Firm Size**

**Measurement:** Number of full-time equivalent employees **Response Format:** Open-ended numerical response **Categorization:**

- Micro: < 10 employees
- Small: 10–49 employees
- Medium: 50–249 employees **Analytical Treatment:** Logarithmic transformation applied to normalize distribution

**3.5.2 Firm Age**

**Measurement:** Number of years since establishment **Response Format:** Open-ended numerical response (year of establishment) **Categorization:**

- < 10 years
- 10–20 years
- 21–30 years
- 30 years **Analytical Treatment:** Logarithmic transformation applied to normalize distribution

**3.5.3 IT Intensity**

**Measurement:** Percentage of employees who regularly use computers in their work **Response Format:** Percentage scale (0–100%) **Categorization:**

- Low: < 30%
- Medium: 30–60%
- High: > 60% **Rationale:** Controls for baseline technological infrastructure and digital readiness

**3.5.4 Prior Innovation**

**Measurement:** Historical innovation performance **Response Format:** Multi-item scale assessing past innovation activities and outcomes **Rationale:** Controls for organizational innovation history and path dependencies

**3.6 Demographic and Contextual Information**

Additional items captured:

- Industry subsector classification
- Respondent job title and tenure
- Firm ownership structure
- Primary market served (local, regional, national, international)

**4. Scale Sources and Adaptation**

**4.1 Theoretical Foundations**

The measurement instruments were grounded in established theoretical frameworks and adapted from validated scales in prior literature. The study integrated three complementary theoretical perspectives:

1. **Resource-Based View (RBV):** Conceptualizing BI capabilities as strategic organizational resources that provide competitive advantage
2. **Knowledge-Based View (KBV):** Positioning knowledge management as a critical organizational capability for value creation
3. **Dynamic Capabilities Theory:** Framing organizational capacity to adapt and innovate through BI and KM capabilities

**4.2 Scale Development Process**

The instrument development followed a rigorous multi-stage process to ensure content validity, construct validity, and reliability:

**Stage 1: Literature Review and Item Generation**

An extensive review of prior research on business intelligence, knowledge management, innovation, and data-driven decision-making was conducted to identify validated measurement scales. Items were selected and adapted from established instruments that demonstrated strong psychometric properties in previous studies.

**Key Source Domains:**

- Business intelligence and analytics capabilities literature
- Knowledge management and organizational learning research
- Innovation performance measurement studies
- Data-driven decision-making and evidence-based management research

**Stage 2: Expert Review**

A panel of academic experts and industry practitioners reviewed the initial item pool to assess:

- Content validity: Whether items adequately captured the theoretical constructs
- Face validity: Whether items were clear, unambiguous, and appropriate for the SME context
- Contextual relevance: Whether items were applicable to manufacturing SMEs with varying levels of BI and KM sophistication

Expert feedback led to refinement of item wording, elimination of redundant items, and addition of context-specific items relevant to manufacturing SMEs.

**Stage 3: Pilot Testing**

A pilot study was conducted with a sample of 45 manufacturing SMEs to assess:

- Item clarity and comprehensibility
- Response patterns and variance
- Preliminary reliability estimates
- Survey length and respondent burden
- Technical functionality of online survey platform

**Pilot Study Outcomes:**

- Minor wording adjustments to improve clarity
- Confirmation of appropriate response variance across items
- Preliminary Cronbach's α values exceeding 0.80 for all constructs
- Average completion time of 18 minutes, deemed acceptable
- Successful technical deployment of online survey

**Stage 4: Scale Refinement**

Based on pilot study results, final adjustments were made to:

- Simplify complex or ambiguous item wording
- Ensure consistent response scale formatting
- Optimize item order to maintain respondent engagement
- Finalize both online and paper-based versions

**4.3 Adaptation for SME Context**

While the scales were adapted from validated instruments, several modifications were made to enhance relevance for manufacturing SMEs:

1. **Simplified Language:** Technical jargon was minimized to accommodate respondents with varying levels of formal business education
2. **Contextual Examples:** Items were framed with reference to manufacturing operations and SME-relevant scenarios
3. **Scalability Considerations:** Items were worded to be applicable across micro, small, and medium enterprises with varying levels of technological sophistication
4. **Resource Constraints:** Recognition that SMEs may have less formalized BI and KM systems compared to large enterprises

**4.4 Validated Scale Sources**

The measurement instruments drew upon established scales from prior literature, including research on:

- **BI Capabilities:** Adapted from studies examining organizational information processing capabilities, business analytics competencies, and data management infrastructure
- **Knowledge Management:** Adapted from research on knowledge sharing behaviors, absorptive capacity, and organizational learning mechanisms
- **Innovation Performance:** Adapted from innovation measurement frameworks distinguishing product and process innovation outcomes
- **DDDM Culture:** Adapted from research on evidence-based management, analytical culture, and data-driven organizational practices

All adapted scales demonstrated strong psychometric properties in their original contexts, with Cronbach's α values exceeding 0.80 and evidence of construct validity through confirmatory factor analysis.

**5. Data Collection Procedure**

**5.1 Survey Administration Process**

The data collection process was designed to maximize response rates while ensuring data quality and respondent confidentiality.

**Phase 1: Sampling Frame Development**

A comprehensive database of manufacturing SMEs was compiled from:

- Industry association membership lists
- Business registry databases
- Chamber of commerce directories
- Manufacturing sector directories

The sampling frame was stratified by firm size, industry subsector, and geographic region to enable systematic random sampling within strata.

**Phase 2: Initial Contact**

Potential respondents were contacted through multiple channels:

- **Email Invitation:** Personalized emails sent to identified key informants explaining the study purpose, eligibility criteria, and participation benefits
- **Telephone Follow-Up:** Phone calls to firms that did not respond to email invitations, providing additional information and addressing questions
- **Postal Mail:** Physical invitation letters sent to firms without valid email contacts or those preferring paper-based communication

The initial contact materials included:

- Study overview and objectives
- Explanation of respondent selection criteria
- Estimated completion time
- Assurances of confidentiality and anonymity
- Contact information for study investigators
- Links to online survey or instructions for requesting paper questionnaire

**Phase 3: Survey Distribution**

**Online Survey:**

- Respondents received a unique survey link via email
- The online platform included progress indicators and save-and-resume functionality
- Built-in validation checks minimized missing data and response errors
- Automated reminders sent to incomplete responses

**Paper-Based Survey:**

- Questionnaires mailed to respondents who requested physical copies
- Pre-paid return envelopes included for convenient return
- Cover letter reiterating study purpose and confidentiality assurances

**Phase 4: Follow-Up Procedures**

To enhance response rates, a systematic follow-up protocol was implemented:

- **Week 1:** Initial survey invitation sent
- **Week 2:** First reminder email/call to non-respondents
- **Week 3:** Second reminder with emphasis on study importance and deadline
- **Week 4:** Final reminder with extended deadline for completion
- **Week 5:** Telephone follow-up to selected non-respondents to encourage participation

Follow-up communications emphasized:

- The value of the respondent's participation
- Confidentiality and anonymity protections
- Flexibility in completion mode (online or paper)
- Availability of study results upon completion

**5.2 Response Rate and Non-Response Analysis**

**Target Sample:** 1,200 manufacturing SMEs contacted **Completed Surveys:** 430 usable responses **Response Rate:** 35.8%

The response rate was consistent with typical response rates for organizational surveys of SMEs. Non-response bias was assessed by comparing early and late respondents on key demographic variables (firm size, age, industry subsector), with no significant differences detected, suggesting minimal non-response bias.

**5.3 Anonymity and Confidentiality Assurances**

To encourage honest and accurate responses, multiple measures were implemented to protect respondent anonymity and data confidentiality:

**Anonymity Protections**

1. **De-Identification:** Survey responses were not linked to personally identifiable information. Respondent names and firm names were not collected in the questionnaire.
2. **Unique Identifiers:** Anonymous numerical codes were used to track responses for follow-up purposes, with the code-to-firm linkage maintained in a secure, separate database accessible only to the research team.
3. **Aggregate Reporting:** All results were reported in aggregate form, ensuring that individual firms or respondents could not be identified.

**Confidentiality Measures**

1. **Secure Data Storage:** All electronic data were stored on password-protected, encrypted servers with restricted access.
2. **Physical Security:** Paper questionnaires were stored in locked filing cabinets in secure research facilities.
3. **Access Restrictions:** Only authorized research team members had access to raw data, with strict confidentiality agreements in place.
4. **Data Retention:** Clear policies regarding data retention and eventual secure destruction were communicated to respondents.

**Informed Consent**

1. **Voluntary Participation:** All invitation materials clearly stated that participation was voluntary and that respondents could withdraw at any time without penalty.
2. **Informed Consent Statement:** The survey included an informed consent statement at the beginning, explaining:
   - Study purpose and procedures
   - Voluntary nature of participation
   - Confidentiality protections
   - Intended use of data
   - Contact information for questions or concerns
3. **Consent Documentation:** Completion and submission of the survey constituted implied consent, with explicit acknowledgment required in the online version.

**5.4 Data Quality Assurance**

Several procedures were implemented to ensure data quality:

1. **Attention Checks:** The online survey included attention-check items to identify careless or inattentive responding.
2. **Response Time Monitoring:** Extremely short completion times were flagged for review to identify potential low-quality responses.
3. **Consistency Checks:** Responses were screened for inconsistent or contradictory patterns.
4. **Missing Data Screening:** Cases with excessive missing data (> 20% of items) were excluded from analysis.
5. **Outlier Detection:** Univariate and multivariate outliers were identified and examined for data entry errors or unusual response patterns.

**5.5 Ethical Compliance**

The study adhered to ethical guidelines for research involving human subjects:

1. **Institutional Review:** The research protocol was reviewed and approved by the relevant institutional ethics committee prior to data collection.
2. **Ethical Standards:** The study complied with professional ethical standards for business and management research.
3. **Participant Rights:** Respondents' rights to privacy, confidentiality, and voluntary participation were respected throughout the study.
4. **Transparency:** Study purpose, procedures, and intended use of data were clearly communicated to all potential respondents.

**6. Instrument Validation**

Comprehensive psychometric analyses were conducted to establish the reliability and validity of the measurement instruments. The validation process followed established guidelines for scale development and structural equation modeling.

**6.1 Reliability Analysis**

Reliability refers to the consistency and stability of measurement. Multiple reliability indices were calculated for each construct and sub-scale.

**6.1.1 Internal Consistency Reliability**

**Cronbach's Alpha (α):** Cronbach's α assesses the extent to which items within a scale measure the same underlying construct. Values above 0.70 are generally considered acceptable, with values above 0.80 indicating good reliability and values above 0.90 indicating excellent reliability.

**Results:**

| **Construct/Sub-Scale** | **Cronbach's α** | **Interpretation** |
| --- | --- | --- |
| **BI Capabilities (Overall)** | 0.93 | Excellent |
| - Data Capture | 0.89 | Good |
| - Analytics | 0.91 | Excellent |
| - Interpretation | 0.90 | Excellent |
| **KM Capability (Overall)** | 0.92 | Excellent |
| - Knowledge Sharing | 0.90 | Excellent |
| - Absorptive Capacity | 0.89 | Good |
| **Innovation Performance (Overall)** | 0.94 | Excellent |
| - Product Innovation | 0.92 | Excellent |
| - Process Innovation | 0.91 | Excellent |
| **DDDM Culture** | 0.91 | Excellent |

All constructs and sub-scales demonstrated excellent internal consistency reliability, substantially exceeding the recommended threshold of 0.70. These high α values indicate that items within each scale consistently measure the intended construct.

**6.1.2 Composite Reliability (CR)**

Composite reliability provides a more accurate estimate of reliability than Cronbach's α, as it accounts for the actual factor loadings of items rather than assuming equal loadings. CR values above 0.70 are considered acceptable.

**Results:**

| **Construct/Sub-Scale** | **Composite Reliability** | **Interpretation** |
| --- | --- | --- |
| **BI Capabilities (Overall)** | 0.94 | Excellent |
| - Data Capture | 0.90 | Excellent |
| - Analytics | 0.92 | Excellent |
| - Interpretation | 0.91 | Excellent |
| **KM Capability (Overall)** | 0.93 | Excellent |
| - Knowledge Sharing | 0.91 | Excellent |
| - Absorptive Capacity | 0.90 | Excellent |
| **Innovation Performance (Overall)** | 0.95 | Excellent |
| - Product Innovation | 0.93 | Excellent |
| - Process Innovation | 0.92 | Excellent |
| **DDDM Culture** | 0.92 | Excellent |

All composite reliability values exceeded 0.90, indicating excellent reliability and confirming that the measurement scales consistently capture the intended constructs.

**6.2 Validity Analysis**

Validity refers to the extent to which a measurement instrument accurately measures the intended construct. Multiple forms of validity were assessed.

**6.2.1 Content Validity**

Content validity assesses whether the items adequately represent the full domain of the construct. Content validity was established through:

1. **Literature Review:** Items were adapted from validated scales in prior research, ensuring theoretical grounding
2. **Expert Review:** A panel of academic and industry experts evaluated item relevance and representativeness
3. **Pilot Testing:** Feedback from pilot study participants confirmed item clarity and relevance

The systematic development process and expert validation provided strong evidence of content validity.

**6.2.2 Convergent Validity**

Convergent validity assesses whether items that should theoretically be related are indeed related. Convergent validity was evaluated using Average Variance Extracted (AVE).

**Average Variance Extracted (AVE):** AVE represents the average proportion of variance in items explained by the underlying construct. AVE values above 0.50 indicate that the construct explains more than half of the variance in its indicators, demonstrating convergent validity.

**Results:**

| **Construct/Sub-Scale** | **AVE** | **Interpretation** |
| --- | --- | --- |
| **BI Capabilities (Overall)** | 0.68 | Good convergent validity |
| - Data Capture | 0.69 | Good convergent validity |
| - Analytics | 0.74 | Good convergent validity |
| - Interpretation | 0.71 | Good convergent validity |
| **KM Capability (Overall)** | 0.66 | Good convergent validity |
| - Knowledge Sharing | 0.67 | Good convergent validity |
| - Absorptive Capacity | 0.64 | Good convergent validity |
| **Innovation Performance (Overall)** | 0.70 | Good convergent validity |
| - Product Innovation | 0.73 | Good convergent validity |
| - Process Innovation | 0.74 | Good convergent validity |
| **DDDM Culture** | 0.68 | Good convergent validity |

All AVE values exceeded the 0.50 threshold, with most exceeding 0.65, indicating strong convergent validity. These results confirm that items within each construct share substantial common variance and effectively measure the intended latent construct.

**6.2.3 Discriminant Validity**

Discriminant validity assesses whether constructs that should theoretically be distinct are indeed distinct. Discriminant validity was evaluated using the Fornell-Larcker criterion.

**Fornell-Larcker Criterion:** This criterion requires that the square root of each construct's AVE should exceed its correlations with other constructs. This ensures that each construct shares more variance with its own indicators than with other constructs.

**Results:**

| **Construct** | **1** | **2** | **3** | **4** |
| --- | --- | --- | --- | --- |
| 1. BI Capabilities | **(0.82)** |  |  |  |
| 2. KM Capability | 0.64 | **(0.81)** |  |  |
| 3. Innovation Performance | 0.58 | 0.67 | **(0.84)** |  |
| 4. DDDM Culture | 0.61 | 0.59 | 0.54 | **(0.82)** |

*Note: Diagonal values in parentheses represent the square root of AVE. Off-diagonal values represent inter-construct correlations.*

The square root of AVE for each construct (diagonal values) exceeded all correlations with other constructs (off-diagonal values), confirming discriminant validity. This demonstrates that each construct is empirically distinct and measures a unique aspect of organizational capabilities or performance.

**6.2.4 Confirmatory Factor Analysis (CFA)**

Confirmatory factor analysis was conducted to assess the measurement model's fit to the data and to validate the hypothesized factor structure.

**CFA Procedure:**

- **Software:** AMOS 26.0
- **Estimation Method:** Maximum likelihood estimation
- **Model Specification:** Second-order factor models for BI Capabilities, KM Capability, and Innovation Performance; first-order factor model for DDDM Culture

**Measurement Model Fit Indices:**

| **Fit Index** | **Value** | **Recommended Threshold** | **Interpretation** |
| --- | --- | --- | --- |
| χ²/df | 2.14 | < 3.0 | Excellent fit |
| Comparative Fit Index (CFI) | 0.96 | > 0.95 | Excellent fit |
| Tucker-Lewis Index (TLI) | 0.95 | > 0.95 | Excellent fit |
| Root Mean Square Error of Approximation (RMSEA) | 0.052 | < 0.06 | Good fit |
| Standardized Root Mean Square Residual (SRMR) | 0.041 | < 0.08 | Excellent fit |

All fit indices met or exceeded recommended thresholds, indicating excellent fit between the hypothesized measurement model and the observed data. These results provide strong evidence that the factor structure is appropriate and that the items effectively measure their intended constructs.

**Factor Loadings:** All item factor loadings exceeded 0.70 (standardized), indicating that each item strongly represents its underlying construct. Factor loadings ranged from 0.72 to 0.89, with an average loading of 0.81, demonstrating robust item-construct relationships.

**6.3 Common Method Bias Assessment**

Common method bias (CMB) refers to measurement error arising from the use of a common method (self-report survey) to measure multiple constructs. CMB can artificially inflate correlations among constructs.

**CMB Mitigation Strategies:**

**Procedural Remedies:**

1. **Anonymity Assurances:** Respondents were assured of anonymity to reduce social desirability bias
2. **Item Separation:** Items measuring different constructs were interspersed throughout the questionnaire rather than grouped by construct
3. **Clear Instructions:** Items were worded clearly and unambiguously to reduce interpretation bias
4. **Reverse-Coded Items:** Selected items were reverse-coded to minimize acquiescence bias

**Statistical Assessment:** Common method bias was assessed using Harman's single-factor test. An exploratory factor analysis with all items loaded onto a single factor revealed that the single factor explained 38.2% of the variance, well below the 50% threshold that would indicate substantial common method bias. This result, combined with the strong discriminant validity evidence, suggests that common method bias is not a significant concern in this study.

**6.4 Summary of Psychometric Properties**

The comprehensive validation analyses provide strong evidence for the reliability and validity of the measurement instruments:

**Reliability:**

- All constructs demonstrated excellent internal consistency (α > 0.89)
- Composite reliability values exceeded 0.90 for all constructs
- Measurement scales consistently capture intended constructs

**Validity:**

- Content validity established through systematic scale development and expert review
- Convergent validity confirmed through AVE values exceeding 0.50
- Discriminant validity confirmed through Fornell-Larcker criterion
- Confirmatory factor analysis demonstrated excellent model fit
- Common method bias assessed and found to be minimal

These robust psychometric properties ensure that the survey instruments provide accurate, consistent, and valid measurements of business intelligence capabilities, knowledge management capability, innovation performance, and data-driven decision-making culture in manufacturing SMEs.

**References**

The measurement instruments and data collection procedures described in this document were developed based on established methodological guidelines and validated scales from prior research. Key methodological references include:

**Scale Development and Validation:**

- Churchill, G. A. (1979). A paradigm for developing better measures of marketing constructs. *Journal of Marketing Research*, 16(1), 64-73.
- Hinkin, T. R. (1998). A brief tutorial on the development of measures for use in survey questionnaires. *Organizational Research Methods*, 1(1), 104-121.
- DeVellis, R. F. (2016). *Scale development: Theory and applications* (4th ed.). Sage Publications.

**Reliability and Validity Assessment:**

- Cronbach, L. J. (1951). Coefficient alpha and the internal structure of tests. *Psychometrika*, 16(3), 297-334.
- Fornell, C., & Larcker, D. F. (1981). Evaluating structural equation models with unobservable variables and measurement error. *Journal of Marketing Research*, 18(1), 39-50.
- Hair, J. F., Black, W. C., Babin, B. J., & Anderson, R. E. (2019). *Multivariate data analysis* (8th ed.). Cengage Learning.

**Structural Equation Modeling:**

- Byrne, B. M. (2016). *Structural equation modeling with AMOS: Basic concepts, applications, and programming* (3rd ed.). Routledge.
- Kline, R. B. (2015). *Principles and practice of structural equation modeling* (4th ed.). Guilford Press.

**Survey Research Methods:**

- Dillman, D. A., Smyth, J. D., & Christian, L. M. (2014). *Internet, phone, mail, and mixed-mode surveys: The tailored design method* (4th ed.). Wiley.
- Fowler, F. J. (2013). *Survey research methods* (5th ed.). Sage Publications.

**Common Method Bias:**

- Podsakoff, P. M., MacKenzie, S. B., Lee, J. Y., & Podsakoff, N. P. (2003). Common method biases in behavioral research: A critical review of the literature and recommended remedies. *Journal of Applied Psychology*, 88(5), 879-903.

**Business Intelligence and Knowledge Management Measurement:**

- Gold, A. H., Malhotra, A., & Segars, A. H. (2001). Knowledge management: An organizational capabilities perspective. *Journal of Management Information Systems*, 18(1), 185-214.
- Popovič, A., Hackney, R., Coelho, P. S., & Jaklič, J. (2012). Towards business intelligence systems success: Effects of maturity and culture on analytical decision making. *Decision Support Systems*, 54(1), 729-739.

**Innovation Performance Measurement:**

- Jiménez-Jiménez, D., & Sanz-Valle, R. (2011). Innovation, organizational learning, and performance. *Journal of Business Research*, 64(4), 408-417.
- Wang, C. L., & Ahmed, P. K. (2004). The development and validation of the organisational innovativeness construct using confirmatory factor analysis. *European Journal of Innovation Management*, 7(4), 303-313.
