# Supplementary material
Source: Research Square preprint supplement (doi:10.21203/rs.3.rs-9439065/v1)
Supplement: Supplementary file 5 [file d0debf4ed72f53ba66e1c79c.docx]

**Data Files: All Data Used in the Analysis**

**Research Paper:** Can Business Intelligence Make Small Businesses More Innovative? Understanding the Role of Knowledge Management and Data-Driven Decision Making

**1. Overview of Dataset**

This study employed a cross-sectional survey design to investigate the relationships between business intelligence (BI) capabilities, knowledge management (KM) capability, data-driven decision making (DDDM) culture, and innovation performance in manufacturing small and medium-sized enterprises (SMEs). The dataset comprises comprehensive survey responses from 430 manufacturing SMEs across diverse industry subsectors, capturing multi-dimensional constructs through validated measurement instruments.

**Key Dataset Characteristics:**

- **Final Sample Size:** 430 manufacturing SMEs
- **Data Type:** Cross-sectional survey data
- **Target Population:** Small and medium-sized enterprises in the manufacturing sector
- **Unit of Analysis:** Firm-level (organizational)
- **Measurement Approach:** Multi-item Likert scales adapted from validated instruments
- **Data Structure:** Structured quantitative data with latent constructs measured through reflective indicators

**2. Raw Data**

**2.1 Sample Size and Scope**

**Sample Size:** n = 430 manufacturing SMEs

**Geographic Scope:** The study targeted manufacturing SMEs; however, the specific geographic location, country, or region is not explicitly documented in the source materials. The sample represents a diverse cross-section of manufacturing subsectors.

**Unit of Analysis:** Firm-level (organizational). Each observation represents one manufacturing SME, with responses provided by key informants within the organization.

**2.2 Sampling Frame and Strategy**

**Sampling Frame:** Manufacturing SMEs across multiple industry subsectors, encompassing firms ranging from micro enterprises (fewer than 10 employees) to medium-sized enterprises (up to 249 employees).

**Sampling Strategy:** Stratified random sampling

The sampling approach ensured representation across:

- **Firm size categories** (micro, small, medium)
- **Industry subsectors** (8 manufacturing categories)
- **IT intensity levels** (low, medium, high)
- **Firm age groups** (4 age categories)

This stratification strategy enabled adequate representation of diverse organizational contexts and technological capabilities within the manufacturing SME population.

**2.3 Data Collection Period**

**Data Collection Period:** Not explicitly documented in the source materials. The study employed a cross-sectional design, indicating data were collected at a single point in time.

**2.4 Response Rate**

**Response Rate:** Not explicitly documented in the source materials. The final sample of 430 firms represents the usable responses after data cleaning and validation procedures.

**2.5 Data Collection Method**

**Survey Administration:** Self-administered structured questionnaire

**Delivery Modes:**

- Online survey platform
- Paper-based questionnaire

**Key Informants:** Responses were collected from organizational decision-makers with comprehensive knowledge of the firm's BI systems, knowledge management practices, and innovation activities. Typical respondent roles included:

- Owner-managers
- Senior managers
- IT managers
- Innovation managers

**Questionnaire Structure:** The survey instrument comprised multiple validated scales measuring:

- Business Intelligence Capabilities (12 items across 3 dimensions)
- Knowledge Management Capability (10 items across 2 dimensions)
- Innovation Performance (8 items across 2 dimensions)
- Data-Driven Decision Making Culture (6 items)
- Firm characteristics and control variables

**3. Sample Composition Table**

The following table provides a comprehensive breakdown of the sample characteristics across four key dimensions: firm size, firm age, industry subsector, and IT intensity.

**Table 1: Sample Composition and Demographic Characteristics (N = 430)**

| **Characteristic** | **Category** | **Frequency** | **Percentage** |
| --- | --- | --- | --- |
| **Firm Size** |  |  |  |
|  | Micro (< 10 employees) | 70 | 16.2% |
|  | Small (10–49 employees) | 220 | 51.2% |
|  | Medium (50–249 employees) | 140 | 32.6% |
| **Firm Age** |  |  |  |
|  | < 10 years | 82 | 19.1% |
|  | 10–20 years | 156 | 36.3% |
|  | 21–30 years | 108 | 25.1% |
|  | > 30 years | 84 | 19.5% |
| **Industry Subsector** |  |  |  |
|  | Food and beverages | 71 | 16.5% |
|  | Textiles and apparel | 52 | 12.1% |
|  | Chemicals and pharmaceuticals | 61 | 14.2% |
|  | Plastics and rubber | 38 | 8.8% |
|  | Machinery and equipment | 79 | 18.4% |
|  | Electronics and electrical | 56 | 13.0% |
|  | Automotive components | 43 | 10.0% |
|  | Other manufacturing | 30 | 7.0% |
| **IT Intensity** |  |  |  |
|  | Low (< 30% employees use computers) | 98 | 22.8% |
|  | Medium (30–60% employees use computers) | 187 | 43.5% |
|  | High (> 60% employees use computers) | 145 | 33.7% |

**3.1 Sample Distribution Analysis**

**Firm Size Distribution:** The sample demonstrates a concentration in small enterprises (10–49 employees), which constitute 51.2% of the sample (220 firms). Medium-sized enterprises represent 32.6% (140 firms), while micro enterprises account for 16.2% (70 firms). This distribution reflects the typical structure of manufacturing SME populations, where small enterprises predominate.

**Firm Age Distribution:** The sample exhibits relatively balanced representation across age categories, with the largest group being firms aged 10–20 years (36.3%, 156 firms), followed by firms aged 21–30 years (25.1%, 108 firms). Younger firms (< 10 years) represent 19.1% (82 firms), while mature firms (> 30 years) account for 19.5% (84 firms). This distribution captures firms at various stages of organizational development and maturity.

**Industry Subsector Distribution:** The sample encompasses eight distinct manufacturing subsectors, ensuring broad industry representation. The largest subsectors are machinery and equipment (18.4%, 79 firms), food and beverages (16.5%, 71 firms), and chemicals and pharmaceuticals (14.2%, 61 firms). Smaller but significant representation includes electronics and electrical (13.0%, 56 firms), textiles and apparel (12.1%, 52 firms), automotive components (10.0%, 43 firms), plastics and rubber (8.8%, 38 firms), and other manufacturing (7.0%, 30 firms).

**IT Intensity Distribution:** IT intensity, measured as the percentage of employees using computers, shows that 43.5% of firms (187 firms) have medium IT intensity (30–60% computer usage), 33.7% (145 firms) have high IT intensity (> 60% usage), and 22.8% (98 firms) have low IT intensity (< 30% usage). This distribution indicates that the majority of sampled firms have moderate to high levels of digital infrastructure, which is relevant for assessing BI capabilities.

**4. Data Collection Method**

**4.1 Survey Instrument**

**Instrument Type:** Self-administered structured questionnaire

**Scale Type:** Multi-item Likert scales (analysis of descriptive statistics suggests 7-point scales based on means and standard deviations)

**Instrument Development:** Measurement scales were adapted from previously validated instruments in the literature. All constructs were operationalized using established scales with demonstrated reliability and validity in prior research.

**4.2 Administration Modes**

**Online Survey:**

- Electronic questionnaire distributed via online survey platform
- Enabled efficient data collection and automated data entry
- Reduced data entry errors and missing responses through validation rules

**Paper-Based Survey:**

- Traditional paper questionnaire for respondents preferring offline completion
- Manually entered into database with quality control procedures
- Provided accessibility for firms with limited digital infrastructure

**4.3 Key Informants**

**Target Respondents:** The study employed a key informant approach, targeting organizational decision-makers with comprehensive knowledge of:

- Business intelligence systems and capabilities
- Knowledge management practices and processes
- Innovation activities and outcomes
- Organizational culture and decision-making processes

**Typical Respondent Roles:**

- **Owner-Managers:** Particularly in smaller firms, providing holistic organizational perspective
- **Senior Managers:** C-suite executives and senior leadership with strategic oversight
- **IT Managers:** Technical leaders with detailed knowledge of BI systems and data infrastructure
- **Innovation Managers:** Specialists responsible for innovation initiatives and performance tracking

**Respondent Selection Criteria:**

- Minimum 2 years tenure in current role (ensuring adequate organizational knowledge)
- Direct involvement in or oversight of BI, KM, or innovation activities
- Authority to provide accurate information about organizational practices and performance

**4.4 Data Collection Procedures**

**Survey Distribution:** The specific procedures for survey distribution, follow-up protocols, and response tracking are not fully documented in the source materials. Standard practices for such studies typically include:

- Initial contact with target firms through business directories or industry associations
- Personalized invitation letters explaining study purpose and confidentiality
- Multiple follow-up reminders to non-respondents
- Incentives for participation (if applicable)

**Quality Control:**

- Screening questions to verify respondent eligibility
- Attention check items to identify careless responding
- Completeness checks before survey submission
- Data validation during entry (for paper-based responses)

**5. Processed/Transformed Data**

**5.1 Data Cleaning Procedures**

**Cleaned Dataset:** The final analytical dataset of 430 firms represents data that underwent comprehensive cleaning and validation procedures.

**Missing Data Handling:**

- **Method:** Listwise deletion (also known as complete case analysis)
- **Rationale:** Cases with missing values on any variable were excluded from the analysis
- **Impact:** The final sample of 430 represents complete cases with no missing data on key variables
- **Limitation:** Listwise deletion may reduce sample size and potentially introduce bias if data are not missing completely at random (MCAR)

**Note:** The source materials do not provide detailed information about:

- Initial sample size before missing data deletion
- Percentage of cases excluded due to missing data
- Missing data patterns or mechanisms (MCAR, MAR, MNAR)
- Sensitivity analyses comparing listwise deletion to alternative approaches (e.g., multiple imputation)

**5.2 Outlier Screening**

**Outlier Detection:** The study conducted outlier screening procedures to identify and address extreme values that could distort statistical analyses.

**Procedures Implemented:**

- Univariate outlier detection (examining extreme values on individual variables)
- Multivariate outlier detection (identifying cases with unusual patterns across multiple variables)

**Treatment Approach:** The source materials do not explicitly document:

- Specific outlier detection criteria (e.g., z-scores > 3.29, Mahalanobis distance)
- Number of outliers identified
- Treatment method (deletion, winsorization, transformation, or retention)

**Impact:** The final sample of 430 firms represents data after outlier screening, ensuring that extreme values do not unduly influence parameter estimates and model fit.

**5.3 Variable Transformations**

**Logarithmic Transformations:**

To address potential non-normality and non-linear relationships, logarithmic transformations were applied to two control variables:

**1. Firm Size (log transformation)**

- **Original Variable:** Number of employees (continuous)
- **Transformed Variable:** log(Firm Size)
- **Rationale:**
  - Firm size typically exhibits positive skewness (many small firms, few large firms)
  - Logarithmic transformation normalizes the distribution
  - Captures diminishing marginal effects of size on innovation
- **Interpretation:** A one-unit increase in log(Firm Size) represents a proportional (multiplicative) increase in the number of employees

**2. Firm Age (log transformation)**

- **Original Variable:** Years since establishment (continuous)
- **Transformed Variable:** log(Firm Age)
- **Rationale:**
  - Firm age often exhibits positive skewness
  - Logarithmic transformation normalizes the distribution
  - Captures diminishing effects of age on innovation over time
- **Interpretation:** A one-unit increase in log(Firm Age) represents a proportional increase in organizational age

**Benefits of Log Transformations:**

- Improved normality of distributions
- Reduced influence of extreme values
- Better model fit in structural equation modeling
- More interpretable relationships (proportional rather than absolute effects)

**5.4 Interaction Term Creation**

**Moderation Analysis Requirement:**

To test the moderating effect of data-driven decision making (DDDM) culture on the relationship between knowledge management (KM) capability and innovation performance, an interaction term was created.

**Interaction Term: KM × DDDM**

**Creation Method:**

- **Multiplicative Interaction:** The interaction term was computed as the product of KM capability and DDDM culture scores
- **Centering:** While not explicitly documented, best practices suggest mean-centering both variables before creating the interaction term to reduce multicollinearity and facilitate interpretation

**Purpose:**

- Test whether the effect of KM capability on innovation performance varies as a function of DDDM culture
- Operationalize the moderated mediation hypothesis (H4)

**Interpretation:**

- A significant positive coefficient for the interaction term (β = 0.16, p < 0.001) indicates that the positive effect of KM on innovation is stronger in firms with higher DDDM culture
- The interaction enables conditional effects analysis, examining the KM-innovation relationship at different levels of DDDM (e.g., low, medium, high)

**Statistical Implementation:**

- The interaction term was included in the structural equation model alongside main effects
- Bootstrapping procedures (5,000 resamples) were used to test the significance of the moderated mediation effect
- The moderated mediation index (0.11, 95% CI [0.05, 0.18]) quantifies the extent to which DDDM amplifies the indirect effect of BI on innovation through KM

**5.5 Construct Operationalization**

**Latent Variable Measurement:**

All primary constructs were operationalized as latent variables measured through multiple reflective indicators:

**Business Intelligence (BI) Capabilities (12 items)**

- Second-order reflective construct with three first-order dimensions:
  - Data Capture (4 items): Ability to collect and integrate data from multiple sources
  - Analytics (4 items): Capability to analyze data using advanced analytical techniques
  - Interpretation (4 items): Capacity to derive actionable insights from analytical outputs

**Knowledge Management (KM) Capability (10 items)**

- Second-order reflective construct with two first-order dimensions:
  - Knowledge Sharing (5 items): Organizational processes for sharing knowledge across units
  - Absorptive Capacity (5 items): Ability to recognize, assimilate, and apply external knowledge

**Innovation Performance (8 items)**

- Second-order reflective construct with two first-order dimensions:
  - Product Innovation (4 items): Development and commercialization of new products
  - Process Innovation (4 items): Implementation of new production processes and methods

**Data-Driven Decision Making (DDDM) Culture (6 items)**

- Single-order reflective construct measuring organizational culture that prioritizes data and analytics in decision-making

**5.6 Control Variables**

**Four control variables were included in the structural model:**

1. **Firm Size (log-transformed):** Controls for resource availability and organizational complexity
2. **Firm Age (log-transformed):** Controls for organizational maturity and experience
3. **IT Intensity:** Controls for technological infrastructure and digital readiness
4. **Prior Innovation:** Controls for historical innovation performance and organizational innovation capability

**6. Data Quality and Validation Procedures**

**6.1 Reliability Assessment**

**Internal Consistency Reliability:**

All constructs demonstrated excellent internal consistency, exceeding conventional thresholds for reliability:

**Cronbach's Alpha (α):**

- **BI Capabilities:** α = 0.93 (overall)
  - Data Capture: α = 0.89
  - Analytics: α = 0.91
  - Interpretation: α = 0.90
- **KM Capability:** α = 0.92 (overall)
  - Knowledge Sharing: α = 0.90
  - Absorptive Capacity: α = 0.89
- **Innovation Performance:** α = 0.94 (overall)
  - Product Innovation: α = 0.92
  - Process Innovation: α = 0.91
- **DDDM Culture:** α = 0.91

**Interpretation:** All Cronbach's alpha values exceed the recommended threshold of 0.70, with most exceeding 0.90, indicating excellent internal consistency. Items within each scale are highly intercorrelated, measuring a common underlying construct.

**Composite Reliability (CR):**

- **BI Capabilities:** CR = 0.94 (overall)
  - Data Capture: CR = 0.90
  - Analytics: CR = 0.92
  - Interpretation: CR = 0.91
- **KM Capability:** CR = 0.93 (overall)
  - Knowledge Sharing: CR = 0.91
  - Absorptive Capacity: CR = 0.90
- **Innovation Performance:** CR = 0.95 (overall)
  - Product Innovation: CR = 0.93
  - Process Innovation: CR = 0.92
- **DDDM Culture:** CR = 0.92

**Interpretation:** Composite reliability values range from 0.90 to 0.95, all substantially exceeding the 0.70 threshold. CR is generally preferred over Cronbach's alpha in SEM contexts as it accounts for item loadings and measurement error.

**6.2 Validity Assessment**

**Convergent Validity:**

Convergent validity was assessed using Average Variance Extracted (AVE), which measures the proportion of variance captured by the construct relative to measurement error.

**Average Variance Extracted (AVE):**

- **BI Capabilities:** AVE = 0.68 (overall)
  - Data Capture: AVE = 0.69
  - Analytics: AVE = 0.74
  - Interpretation: AVE = 0.71
- **KM Capability:** AVE = 0.66 (overall)
  - Knowledge Sharing: AVE = 0.67
  - Absorptive Capacity: AVE = 0.64
- **Innovation Performance:** AVE = 0.70 (overall)
  - Product Innovation: AVE = 0.73
  - Process Innovation: AVE = 0.74
- **DDDM Culture:** AVE = 0.68

**Interpretation:** All AVE values exceed the recommended threshold of 0.50, ranging from 0.64 to 0.74. This indicates that each construct explains more than 50% of the variance in its indicators, demonstrating adequate convergent validity. Items within each scale converge to measure the intended construct.

**Discriminant Validity:**

Discriminant validity was assessed using the Fornell-Larcker criterion, which requires that the square root of AVE for each construct exceeds its correlations with other constructs.

**Fornell-Larcker Criterion Results:**

- **BI Capabilities:** √AVE = 0.82
- **KM Capability:** √AVE = 0.81
- **Innovation Performance:** √AVE = 0.84
- **DDDM Culture:** √AVE = 0.82

**Inter-Construct Correlations:**

- BI Capabilities ↔ KM Capability: r = 0.64
- BI Capabilities ↔ Innovation Performance: r = 0.58
- BI Capabilities ↔ DDDM Culture: r = 0.61
- KM Capability ↔ Innovation Performance: r = 0.67
- KM Capability ↔ DDDM Culture: r = 0.59
- Innovation Performance ↔ DDDM Culture: r = 0.54

**Interpretation:** The square root of AVE for each construct (0.81–0.84) exceeds all inter-construct correlations (0.54–0.67), satisfying the Fornell-Larcker criterion. This demonstrates that each construct is empirically distinct from others, capturing unique variance not explained by other constructs in the model.

**6.3 Confirmatory Factor Analysis (CFA)**

**Measurement Model Validation:**

Confirmatory factor analysis was conducted to validate the measurement model before testing the structural model. CFA assesses whether the hypothesized factor structure (items loading on their intended constructs) fits the observed data.

**CFA Procedures:**

- All constructs were specified as latent variables with their respective indicators
- Second-order constructs (BI, KM, Innovation) were modeled with first-order dimensions
- Measurement errors were allowed to correlate only when theoretically justified
- Model fit was evaluated using multiple fit indices

**CFA Results:** The source materials confirm that CFA was conducted and demonstrated adequate fit, validating the measurement model. However, specific details not provided include:

- Individual factor loadings for each item
- Modification indices and model adjustments
- Standardized residuals
- Detailed fit indices for the measurement model

**Interpretation:** The validated measurement model provides confidence that observed variables adequately represent their intended latent constructs, supporting subsequent structural model testing.

**6.4 Common Method Bias Assessment**

**Concern:** Common method bias (CMB) arises when data for independent and dependent variables are collected from the same source using the same method, potentially inflating correlations due to systematic measurement error.

**Relevance to This Study:** Since all data were collected via self-report questionnaires from single informants within each firm, common method bias is a potential concern.

**Mitigation Strategies:** The source materials indicate that common method bias was addressed, but specific procedures are not fully documented. Typical approaches include:

**Procedural Remedies:**

- Questionnaire design features (e.g., item separation, scale variation)
- Assurance of respondent anonymity and confidentiality
- Clear instructions emphasizing no right or wrong answers
- Counterbalancing question order

**Statistical Remedies:**

- Harman's single-factor test (examining whether a single factor accounts for majority of variance)
- Common latent factor method (adding a common method factor to the CFA model)
- Correlation matrix inspection (checking for extremely high correlations)

**Assessment:** While the study acknowledges and addresses common method bias, the lack of detailed reporting limits full evaluation of CMB severity and mitigation effectiveness. The moderate inter-construct correlations (r = 0.54–0.67) suggest that CMB is not severe, as extremely high correlations (r > 0.90) are not observed.

**6.5 Normality Assessment**

**Assumption:** Structural equation modeling with maximum likelihood estimation assumes multivariate normality of observed variables.

**Assessment Procedures:** The source materials do not explicitly document normality testing procedures. Standard approaches include:

- Univariate normality tests (skewness and kurtosis statistics, Shapiro-Wilk test)
- Multivariate normality tests (Mardia's coefficient)
- Visual inspection (histograms, Q-Q plots)

**Transformations:** Logarithmic transformations applied to Firm Size and Firm Age suggest that non-normality was identified and addressed for these variables.

**Robustness:** Maximum likelihood estimation is relatively robust to moderate violations of normality, particularly with large sample sizes (N = 430). Bootstrapping procedures (5,000 resamples) used for mediation and moderation analyses provide additional robustness to non-normality.

**6.6 Multicollinearity Assessment**

**Concern:** High multicollinearity among predictor variables can inflate standard errors and reduce statistical power.

**Indicators:** The correlation matrix (Table 3) shows moderate correlations among main constructs (r = 0.54–0.67), suggesting that multicollinearity is not severe. Correlations below 0.80–0.90 are generally acceptable.

**Assessment Procedures:** The source materials do not explicitly document multicollinearity diagnostics such as:

- Variance Inflation Factors (VIF)
- Tolerance statistics
- Condition indices

**Interpretation:** The moderate inter-construct correlations and successful model convergence suggest that multicollinearity did not pose significant problems for parameter estimation.

**6.7 Model Fit Assessment**

**Structural Model Fit:**

The structural equation model demonstrated excellent fit across multiple indices:

**Fit Indices:**

- **χ²/df ratio:** 2.14 (threshold: < 3.0 for good fit) ✓
- **Comparative Fit Index (CFI):** 0.96 (threshold: > 0.95 for excellent fit) ✓
- **Tucker-Lewis Index (TLI):** 0.95 (threshold: > 0.95 for excellent fit) ✓
- **Root Mean Square Error of Approximation (RMSEA):** 0.052 (threshold: < 0.06 for good fit) ✓
- **Standardized Root Mean Square Residual (SRMR):** 0.041 (threshold: < 0.08 for good fit) ✓

**Interpretation:** All fit indices meet or exceed recommended thresholds, indicating that the hypothesized model provides an excellent representation of the observed covariance structure. The model adequately captures the relationships among BI capabilities, KM capability, DDDM culture, and innovation performance.

**6.8 Descriptive Statistics**

**Construct Means and Standard Deviations:**

| **Construct** | **Mean** | **SD** | **Interpretation** |
| --- | --- | --- | --- |
| BI Capabilities | 4.82 | 1.24 | Moderate to moderately high levels |
| - Data Capture | 4.91 | 1.31 | Slightly above overall BI mean |
| - Analytics | 4.68 | 1.29 | Slightly below overall BI mean |
| - Interpretation | 4.87 | 1.26 | Slightly above overall BI mean |
| KM Capability | 5.03 | 1.18 | Moderately high levels |
| - Knowledge Sharing | 5.12 | 1.22 | Highest among all constructs |
| - Absorptive Capacity | 4.94 | 1.21 | Slightly below KM mean |
| Innovation Performance | 4.76 | 1.33 | Moderate to moderately high levels |
| - Product Innovation | 4.69 | 1.38 | Slightly below innovation mean |
| - Process Innovation | 4.83 | 1.35 | Slightly above innovation mean |
| DDDM Culture | 4.58 | 1.41 | Moderate levels, highest variability |

**Note:** Assuming a 7-point Likert scale (1 = strongly disagree, 7 = strongly agree), means ranging from 4.58 to 5.12 indicate that respondents generally agree with statements about their firms' capabilities and performance, with moderate variability across firms.

**6.9 Data Quality Summary**

**Strengths:** ✓ Large sample size (N = 430) providing adequate statistical power ✓ Excellent reliability across all constructs (α = 0.89–0.94, CR = 0.90–0.95) ✓ Strong convergent validity (AVE = 0.64–0.74) ✓ Confirmed discriminant validity (Fornell-Larcker criterion satisfied) ✓ Excellent structural model fit (all indices meet thresholds) ✓ Diverse sample composition across firm sizes, ages, and industries ✓ Validated measurement instruments adapted from prior research ✓ Rigorous analytical procedures (SEM with bootstrapping)

**Limitations and Gaps:** ✗ Response rate not documented (unable to assess non-response bias) ✗ Detailed missing data patterns not reported ✗ Specific outlier detection criteria and treatment not documented ✗ Common method bias testing procedures not fully detailed ✗ Normality and multicollinearity diagnostics not explicitly reported ✗ Individual CFA factor loadings not provided ✗ Geographic location and data collection timeframe not specified ✗ Specific questionnaire items not included in source materials

**Overall Assessment:** The dataset demonstrates high quality based on documented psychometric properties, large sample size, rigorous analytical procedures, and excellent model fit. While some procedural details are not fully documented, the reported evidence strongly supports the reliability and validity of the data used in the analysis.

**7. Data Availability and Reproducibility**

**7.1 Data Access**

**Data Availability Statement:** The source materials do not include an explicit data availability statement. Information about access to the raw dataset, codebook, or supplementary materials is not provided.

**Reproducibility Considerations:**

- Statistical analyses can be replicated using reported parameters and procedures
- Measurement scales can be reconstructed from reliability and validity tables
- Sample characteristics are well-documented for comparison with other studies
- However, access to original data would be required for full replication

**7.2 Supporting Materials**

**Available Documentation:**

- Sample composition table (Table 1)
- Construct reliability and validity table (Table 2)
- Correlation matrix (Table 3)
- Structural model results (Table 4)
- Model fit indices
- Hypothesis testing results

**Materials Not Provided:**

- Complete questionnaire with all item wordings
- Raw data file
- Codebook with variable definitions
- Detailed data collection protocols
- AMOS syntax or input files
- Supplementary analyses or sensitivity tests

**7.3 Ethical Considerations**

**Ethical Approval:** The source materials do not document institutional review board (IRB) approval, ethics committee review, or compliance with specific ethical guidelines.

**Informed Consent:** Procedures for obtaining informed consent from respondents are not detailed in the source materials.

**Data Protection:** Specific measures for ensuring respondent anonymity, confidentiality, and data security are not documented, though standard practices in survey research typically include such protections.

**Publisher's Disclaimer:** The document includes a standard MDPI publisher's disclaimer stating that statements, opinions, and data are solely those of the authors and not of the publisher or editors.

**8. Conclusion**

This comprehensive documentation of data files provides a detailed account of all data used in the analysis of business intelligence, knowledge management, and innovation performance in manufacturing SMEs. The dataset comprises 430 firms with diverse characteristics across firm size, age, industry subsector, and IT intensity, collected through a stratified random sampling approach using self-administered questionnaires.

The data demonstrate excellent psychometric properties, with all constructs exhibiting high reliability (Cronbach's α = 0.89–0.94) and validity (AVE = 0.64–0.74). Rigorous data processing procedures included listwise deletion for missing data, outlier screening, logarithmic transformations for control variables, and creation of interaction terms for moderation analysis. The structural equation model achieved excellent fit (CFI = 0.96, TLI = 0.95, RMSEA = 0.052, SRMR = 0.041), supporting the validity of the analytical findings.
