# Supplementary material
Source: Research Square preprint supplement (doi:10.21203/rs.3.rs-9439065/v1)
Supplement: Supplementary file 6 [file e114d1b61ae1f9c168558019.docx]

**Variable Details: Definitions, Coding Schemes, and Transformations**

**Research Paper:** "Can Business Intelligence Make Small Businesses More Innovative?"

**Table of Contents**

1. [Overview of Variable Structure](https://scispace.com/chat/791cb888-ed9b-4160-94d2-50d2d5a802c4)
2. [Independent Variable: BI Capabilities](https://scispace.com/chat/791cb888-ed9b-4160-94d2-50d2d5a802c4)
3. [Mediating Variable: KM Capability](https://scispace.com/chat/791cb888-ed9b-4160-94d2-50d2d5a802c4)
4. [Dependent Variable: Innovation Performance](https://scispace.com/chat/791cb888-ed9b-4160-94d2-50d2d5a802c4)
5. [Moderating Variable: DDDM Culture](https://scispace.com/chat/791cb888-ed9b-4160-94d2-50d2d5a802c4)
6. [Control Variables](https://scispace.com/chat/791cb888-ed9b-4160-94d2-50d2d5a802c4)
7. [Interaction Term: KM × DDDM](https://scispace.com/chat/791cb888-ed9b-4160-94d2-50d2d5a802c4)
8. [Coding Schemes](https://scispace.com/chat/791cb888-ed9b-4160-94d2-50d2d5a802c4)
9. [Descriptive Statistics Table](https://scispace.com/chat/791cb888-ed9b-4160-94d2-50d2d5a802c4)
10. [Correlation Matrix](https://scispace.com/chat/791cb888-ed9b-4160-94d2-50d2d5a802c4)

**1. Overview of Variable Structure**

This study employs a moderated mediation model to examine how Business Intelligence (BI) capabilities influence innovation performance in manufacturing small and medium-sized enterprises (SMEs). The conceptual framework integrates:

- **One Independent Variable**: BI Capabilities (second-order construct with three dimensions)
- **One Mediating Variable**: Knowledge Management (KM) Capability (second-order construct with two dimensions)
- **One Dependent Variable**: Innovation Performance (second-order construct with two dimensions)
- **One Moderating Variable**: Data-Driven Decision Making (DDDM) Culture (single-order construct)
- **Four Control Variables**: Firm Size, Firm Age, IT Intensity, and Prior Innovation
- **One Interaction Term**: KM × DDDM (for testing moderated mediation)

All primary constructs were measured using validated multi-item scales on a 7-point Likert scale, ranging from 1 (Strongly Disagree) to 7 (Strongly Agree). The study collected data from 430 manufacturing SMEs across diverse industry subsectors.

**Theoretical Foundation:** The variable structure is grounded in three complementary theoretical perspectives:

- **Resource-Based View (RBV)**: BI capabilities as strategic organizational resources
- **Knowledge-Based View (KBV)**: Knowledge management as a critical organizational capability
- **Dynamic Capabilities Theory**: Organizational ability to adapt and innovate through BI and KM integration

**2. Independent Variable: BI Capabilities**

**2.1 Definition**

**Business Intelligence (BI) Capabilities** represent the organizational capacity to systematically collect, analyze, and interpret data to support strategic and operational decision-making. BI capabilities encompass the technological infrastructure, analytical competencies, and interpretive skills that enable firms to transform raw data into actionable business insights.

In the context of manufacturing SMEs, BI capabilities reflect the extent to which organizations can:

- Capture relevant internal and external data from multiple sources
- Apply analytical techniques to identify patterns, trends, and relationships
- Interpret analytical outputs to generate meaningful insights for decision-making

**2.2 Conceptualization**

BI Capabilities is operationalized as a **second-order reflective construct** comprising three first-order dimensions:

**2.2.1 Data Capture Capability**

The organizational ability to systematically collect, integrate, and store data from diverse internal and external sources. This dimension reflects the firm's capacity to:

- Gather data from operational systems (e.g., ERP, CRM, production systems)
- Integrate data from external sources (e.g., market data, supplier data, customer feedback)
- Maintain data quality, consistency, and accessibility
- Ensure timely data availability for analysis

**Number of Items:** 4
**Cronbach's α:** 0.89
**Composite Reliability (CR):** 0.90
**Average Variance Extracted (AVE):** 0.69
**Mean:** 4.91
**Standard Deviation:** 1.31

**2.2.2 Analytics Capability**

The organizational competence in applying analytical techniques and tools to process and analyze data. This dimension captures the firm's ability to:

- Employ descriptive analytics to understand historical performance
- Apply diagnostic analytics to identify root causes of problems
- Utilize predictive analytics to forecast future trends
- Leverage prescriptive analytics to recommend optimal actions

**Number of Items:** 4
**Cronbach's α:** 0.91
**Composite Reliability (CR):** 0.92
**Average Variance Extracted (AVE):** 0.74
**Mean:** 4.68
**Standard Deviation:** 1.29

**2.2.3 Interpretation Capability**

The organizational skill in translating analytical results into actionable business insights and strategic recommendations. This dimension reflects the firm's capacity to:

- Contextualize analytical findings within business objectives
- Communicate insights effectively to decision-makers
- Translate data patterns into strategic implications
- Bridge the gap between technical analysis and business action

**Number of Items:** 4
**Cronbach's α:** 0.90
**Composite Reliability (CR):** 0.91
**Average Variance Extracted (AVE):** 0.71
**Mean:** 4.87
**Standard Deviation:** 1.26

**2.3 Overall Construct Measurement**

**Total Number of Items:** 12 (4 items per dimension)
**Measurement Scale:** 7-point Likert scale (1 = Strongly Disagree, 7 = Strongly Agree)
**Cronbach's α:** 0.93
**Composite Reliability (CR):** 0.94
**Average Variance Extracted (AVE):** 0.68
**Mean:** 4.82
**Standard Deviation:** 1.24

**2.4 Psychometric Properties**

**Reliability:**

- The overall construct demonstrates excellent internal consistency (α = 0.93), well above the recommended threshold of 0.70
- Composite reliability (CR = 0.94) confirms strong reliability
- All three sub-dimensions exhibit strong reliability (α range: 0.89–0.91)

**Validity:**

- **Convergent Validity**: AVE = 0.68 exceeds the 0.50 threshold, indicating that the construct explains more than half of the variance in its indicators
- **Discriminant Validity**: The square root of AVE (0.82) exceeds all correlations with other constructs, confirming discriminant validity
- All sub-dimensions demonstrate adequate convergent validity (AVE range: 0.69–0.74)

**2.5 Role in the Model**

BI Capabilities serves as the **independent variable** in the research model, hypothesized to:

- Directly influence Innovation Performance (H1)
- Indirectly influence Innovation Performance through KM Capability as a mediator (H2)

**Empirical Findings:**

- Direct effect on Innovation Performance: β = 0.28, p < 0.001, 95% CI [0.18, 0.38]
- Effect on KM Capability: β = 0.67, p < 0.001, 95% CI [0.58, 0.76]
- Indirect effect through KM: β = 0.30, p < 0.001, 95% CI [0.22, 0.38]

**2.6 Coding and Transformation**

**Original Coding:**

- Each of the 12 items measured on a 7-point Likert scale
- Higher scores indicate greater BI capabilities
- No reverse-coded items

**Aggregation Method:**

- Second-order construct formed by aggregating the three first-order dimensions
- Reflective measurement model: indicators reflect the underlying latent construct
- Composite scores calculated as the mean of all 12 items

**Transformations Applied:**

- No logarithmic or other mathematical transformations applied to the main construct
- Standardization applied during structural equation modeling for path coefficient estimation

**3. Mediating Variable: KM Capability**

**3.1 Definition**

**Knowledge Management (KM) Capability** represents the organizational capacity to create, share, integrate, and apply knowledge to enhance organizational performance and innovation. KM capability encompasses the processes, practices, and cultural elements that enable firms to effectively leverage both explicit and tacit knowledge resources.

In manufacturing SMEs, KM capability reflects the extent to which organizations can:

- Facilitate knowledge sharing among employees and across organizational units
- Absorb external knowledge from partners, customers, and the broader environment
- Integrate diverse knowledge sources to generate novel insights
- Apply knowledge to solve problems and drive innovation

**3.2 Conceptualization**

KM Capability is operationalized as a **second-order reflective construct** comprising two first-order dimensions:

**3.2.1 Knowledge Sharing**

The organizational processes and practices that facilitate the exchange, dissemination, and transfer of knowledge among individuals, teams, and organizational units. This dimension captures the firm's ability to:

- Create formal and informal channels for knowledge exchange
- Encourage employees to share expertise and best practices
- Document and codify tacit knowledge into explicit forms
- Foster a collaborative culture that values knowledge contribution
- Facilitate cross-functional knowledge transfer

**Number of Items:** 5
**Cronbach's α:** 0.90
**Composite Reliability (CR):** 0.91
**Average Variance Extracted (AVE):** 0.67
**Mean:** 5.12
**Standard Deviation:** 1.22

**3.2.2 Absorptive Capacity**

The organizational ability to recognize, assimilate, and apply external knowledge from the environment. This dimension reflects the firm's capacity to:

- Identify valuable external knowledge sources (customers, suppliers, competitors, research institutions)
- Acquire and internalize external knowledge
- Assimilate new knowledge with existing organizational knowledge
- Transform and exploit external knowledge for commercial purposes
- Adapt external knowledge to the firm's specific context

**Number of Items:** 5
**Cronbach's α:** 0.89
**Composite Reliability (CR):** 0.90
**Average Variance Extracted (AVE):** 0.64
**Mean:** 4.94
**Standard Deviation:** 1.21

**3.3 Overall Construct Measurement**

**Total Number of Items:** 10 (5 items per dimension)
**Measurement Scale:** 7-point Likert scale (1 = Strongly Disagree, 7 = Strongly Agree)
**Cronbach's α:** 0.92
**Composite Reliability (CR):** 0.93
**Average Variance Extracted (AVE):** 0.66
**Mean:** 5.03
**Standard Deviation:** 1.18

**3.4 Psychometric Properties**

**Reliability:**

- The overall construct demonstrates excellent internal consistency (α = 0.92), well above the recommended threshold of 0.70
- Composite reliability (CR = 0.93) confirms strong reliability
- Both sub-dimensions exhibit strong reliability (α = 0.90 for Knowledge Sharing; α = 0.89 for Absorptive Capacity)

**Validity:**

- **Convergent Validity**: AVE = 0.66 exceeds the 0.50 threshold, indicating adequate convergent validity
- **Discriminant Validity**: The square root of AVE (0.81) exceeds all correlations with other constructs, confirming discriminant validity
- Both sub-dimensions demonstrate adequate convergent validity (AVE = 0.67 for Knowledge Sharing; AVE = 0.64 for Absorptive Capacity)

**3.5 Role in the Model**

KM Capability serves as the **mediating variable** in the research model, hypothesized to:

- Mediate the relationship between BI Capabilities and Innovation Performance (H2)
- Directly influence Innovation Performance
- Interact with DDDM Culture to influence Innovation Performance (H3)

**Empirical Findings:**

- Effect of BI on KM: β = 0.67, p < 0.001, 95% CI [0.58, 0.76]
- Direct effect on Innovation Performance: β = 0.45, p < 0.001, 95% CI [0.34, 0.56]
- Mediation effect: Indirect effect = 0.30, p < 0.001, 95% CI [0.22, 0.38]
- Proportion of total effect mediated: 40.4%
- Interaction with DDDM: β = 0.16, p < 0.001, 95% CI [0.07, 0.25]

**3.6 Coding and Transformation**

**Original Coding:**

- Each of the 10 items measured on a 7-point Likert scale
- Higher scores indicate greater KM capability
- No reverse-coded items

**Aggregation Method:**

- Second-order construct formed by aggregating the two first-order dimensions
- Reflective measurement model: indicators reflect the underlying latent construct
- Composite scores calculated as the mean of all 10 items

**Transformations Applied:**

- **Mean-centering**: Applied before creating the interaction term (KM × DDDM) to reduce multicollinearity
- Standardization applied during structural equation modeling for path coefficient estimation

**4. Dependent Variable: Innovation Performance**

**4.1 Definition**

**Innovation Performance** represents the organizational outcomes resulting from innovation activities, encompassing both the development and implementation of new products and processes. Innovation performance reflects the extent to which firms successfully introduce novel offerings and operational improvements that enhance competitive advantage and business performance.

In manufacturing SMEs, innovation performance captures:

- The degree of novelty and market success of new products
- The efficiency gains and quality improvements from process innovations
- The speed and effectiveness of innovation implementation
- The overall contribution of innovation to organizational competitiveness

**4.2 Conceptualization**

Innovation Performance is operationalized as a **second-order reflective construct** comprising two first-order dimensions:

**4.2.1 Product Innovation**

The organizational capability to develop and introduce new or significantly improved products to the market. This dimension captures the firm's success in:

- Developing products that are new to the firm or market
- Introducing products with novel features or functionalities
- Launching products that meet emerging customer needs
- Achieving market acceptance and commercial success of new products
- Maintaining a pipeline of innovative product offerings

**Number of Items:** 4
**Cronbach's α:** 0.92
**Composite Reliability (CR):** 0.93
**Average Variance Extracted (AVE):** 0.73
**Mean:** 4.69
**Standard Deviation:** 1.38

**4.2.2 Process Innovation**

The organizational capability to develop and implement new or significantly improved production processes, delivery methods, or support activities. This dimension reflects the firm's success in:

- Introducing new manufacturing techniques or technologies
- Improving operational efficiency and productivity
- Enhancing product quality through process improvements
- Reducing costs through process optimization
- Implementing innovative logistics, delivery, or support processes

**Number of Items:** 4
**Cronbach's α:** 0.91
**Composite Reliability (CR):** 0.92
**Average Variance Extracted (AVE):** 0.74
**Mean:** 4.83
**Standard Deviation:** 1.35

**4.3 Overall Construct Measurement**

**Total Number of Items:** 8 (4 items per dimension)
**Measurement Scale:** 7-point Likert scale (1 = Strongly Disagree, 7 = Strongly Agree)
**Cronbach's α:** 0.94
**Composite Reliability (CR):** 0.95
**Average Variance Extracted (AVE):** 0.70
**Mean:** 4.76
**Standard Deviation:** 1.33

**4.4 Psychometric Properties**

**Reliability:**

- The overall construct demonstrates excellent internal consistency (α = 0.94), well above the recommended threshold of 0.70
- Composite reliability (CR = 0.95) confirms strong reliability, the highest among all constructs
- Both sub-dimensions exhibit strong reliability (α = 0.92 for Product Innovation; α = 0.91 for Process Innovation)

**Validity:**

- **Convergent Validity**: AVE = 0.70 exceeds the 0.50 threshold, indicating strong convergent validity (highest AVE among main constructs)
- **Discriminant Validity**: The square root of AVE (0.84) exceeds all correlations with other constructs, confirming discriminant validity
- Both sub-dimensions demonstrate strong convergent validity (AVE = 0.73 for Product Innovation; AVE = 0.74 for Process Innovation)

**4.5 Role in the Model**

Innovation Performance serves as the **dependent variable** (outcome variable) in the research model, hypothesized to be influenced by:

- BI Capabilities (direct effect, H1)
- KM Capability (mediating effect, H2)
- The interaction of KM Capability and DDDM Culture (moderation effect, H3)
- Control variables (Firm Size, Firm Age, IT Intensity, Prior Innovation)

**Empirical Findings:**

- Direct effect of BI: β = 0.28, p < 0.001, 95% CI [0.18, 0.38]
- Effect of KM: β = 0.45, p < 0.001, 95% CI [0.34, 0.56]
- Interaction effect (KM × DDDM): β = 0.16, p < 0.001, 95% CI [0.07, 0.25]
- Total variance explained (R²): Not explicitly reported in extracted text

**4.6 Coding and Transformation**

**Original Coding:**

- Each of the 8 items measured on a 7-point Likert scale
- Higher scores indicate better innovation performance
- No reverse-coded items

**Aggregation Method:**

- Second-order construct formed by aggregating the two first-order dimensions
- Reflective measurement model: indicators reflect the underlying latent construct
- Composite scores calculated as the mean of all 8 items

**Transformations Applied:**

- No logarithmic or other mathematical transformations applied to the main construct
- Standardization applied during structural equation modeling for path coefficient estimation

**5. Moderating Variable: DDDM Culture**

**5.1 Definition**

**Data-Driven Decision Making (DDDM) Culture** represents the organizational values, norms, and practices that prioritize the use of data and analytical evidence in decision-making processes. DDDM culture reflects the extent to which an organization systematically relies on data rather than intuition, experience, or hierarchy when making strategic and operational decisions.

In manufacturing SMEs, DDDM culture encompasses:

- The organizational emphasis on collecting and analyzing data before making decisions
- The extent to which managers and employees value data-driven insights
- The degree to which data and analytics are integrated into decision-making routines
- The organizational willingness to challenge assumptions with empirical evidence
- The cultural acceptance of data-driven recommendations, even when they contradict conventional wisdom

**5.2 Conceptualization**

DDDM Culture is operationalized as a **single-order reflective construct** (unidimensional) measured through six items that capture various facets of data-driven organizational culture:

1. **Data Primacy in Decisions**: The extent to which data takes precedence over intuition or hierarchy in decision-making
2. **Analytical Rigor**: The organizational commitment to thorough data analysis before taking action
3. **Evidence-Based Mindset**: The cultural norm of supporting arguments and proposals with empirical evidence
4. **Data Accessibility**: The organizational practice of making data widely available to support decision-making
5. **Analytical Skill Development**: The organizational investment in building data literacy and analytical capabilities
6. **Performance Measurement**: The systematic use of data to monitor and evaluate organizational performance

**5.3 Overall Construct Measurement**

**Total Number of Items:** 6
**Measurement Scale:** 7-point Likert scale (1 = Strongly Disagree, 7 = Strongly Agree)
**Cronbach's α:** 0.91
**Composite Reliability (CR):** 0.92
**Average Variance Extracted (AVE):** 0.68
**Mean:** 4.58
**Standard Deviation:** 1.41

**5.4 Psychometric Properties**

**Reliability:**

- The construct demonstrates excellent internal consistency (α = 0.91), well above the recommended threshold of 0.70
- Composite reliability (CR = 0.92) confirms strong reliability

**Validity:**

- **Convergent Validity**: AVE = 0.68 exceeds the 0.50 threshold, indicating adequate convergent validity
- **Discriminant Validity**: The square root of AVE (0.82) exceeds all correlations with other constructs, confirming discriminant validity

**5.5 Role in the Model**

DDDM Culture serves as the **moderating variable** in the research model, hypothesized to:

- Moderate the relationship between KM Capability and Innovation Performance (H3)
- Amplify the indirect effect of BI Capabilities on Innovation Performance through KM Capability (moderated mediation, H4)

**Theoretical Rationale:** DDDM culture is expected to strengthen the KM-innovation link because:

- Organizations with strong DDDM cultures are better positioned to translate knowledge into actionable insights
- Data-driven cultures provide the decision-making infrastructure that enables knowledge to be effectively applied
- DDDM culture reduces cognitive biases and political barriers that might otherwise impede knowledge utilization

**Empirical Findings:**

- Moderation effect (KM × DDDM → Innovation): β = 0.16, p < 0.001, 95% CI [0.07, 0.25]
- Moderated mediation index: 0.11, p < 0.01, 95% CI [0.05, 0.18]
- Interpretation: The positive effect of KM on innovation is significantly stronger in firms with higher DDDM culture

**5.6 Coding and Transformation**

**Original Coding:**

- Each of the 6 items measured on a 7-point Likert scale
- Higher scores indicate stronger DDDM culture
- No reverse-coded items

**Aggregation Method:**

- Single-order construct: composite scores calculated as the mean of all 6 items
- Reflective measurement model: indicators reflect the underlying latent construct

**Transformations Applied:**

- **Mean-centering**: Applied before creating the interaction term (KM × DDDM) to reduce multicollinearity and facilitate interpretation
- Standardization applied during structural equation modeling for path coefficient estimation

**6. Control Variables**

Control variables are included in the model to account for alternative explanations and isolate the effects of the primary independent variables. Four control variables were incorporated based on prior literature and theoretical considerations.

**6.1 Firm Size**

**6.1.1 Definition and Rationale**

**Firm Size** represents the scale of organizational operations, measured by the number of employees. Firm size is controlled because:

- Larger firms typically have greater resource availability for innovation investments
- Organizational size affects the complexity of knowledge management processes
- Firm size influences the capacity to implement and benefit from BI systems
- Prior research has shown mixed effects of firm size on innovation performance

**6.1.2 Measurement and Coding**

**Original Measurement:**

- Number of employees (continuous variable)

**Categorical Classification:**

- **Micro enterprises**: < 10 employees (n = 70, 16.2%)
- **Small enterprises**: 10–49 employees (n = 220, 51.2%)
- **Medium enterprises**: 50–249 employees (n = 140, 32.6%)

**Transformation:**

- **Logarithmic transformation** applied: log(Number of Employees)
- **Formula**: Firm Size (log) = ln(Number of Employees)
- **Rationale**:
  - Reduces skewness in the distribution
  - Accounts for diminishing marginal effects of size increases
  - Improves normality assumptions for SEM analysis
  - Facilitates interpretation (percentage change interpretation)

**6.1.3 Empirical Effect**

- **Path coefficient**: β = 0.09
- **Standard error**: 0.042
- **t-value**: 2.14
- **p-value**: 0.032 (significant)
- **95% Confidence Interval**: [0.01, 0.17]
- **Interpretation**: Firm size has a small but significant positive effect on innovation performance, controlling for other variables

**6.2 Firm Age**

**6.2.1 Definition and Rationale**

**Firm Age** represents organizational maturity, measured by the number of years since establishment. Firm age is controlled because:

- Organizational age affects accumulated experience and learning
- Older firms may have established routines that facilitate or hinder innovation
- Firm age influences organizational inertia and flexibility
- Prior research has shown curvilinear or non-significant effects of age on innovation

**6.2.2 Measurement and Coding**

**Original Measurement:**

- Number of years since establishment (continuous variable)

**Categorical Classification:**

- **< 10 years**: Young firms (n = 82, 19.1%)
- **10–20 years**: Established firms (n = 156, 36.3%)
- **21–30 years**: Mature firms (n = 108, 25.1%)
- **> 30 years**: Veteran firms (n = 84, 19.5%)

**Transformation:**

- **Logarithmic transformation** applied: log(Firm Age)
- **Formula**: Firm Age (log) = ln(Years Since Establishment)
- **Rationale**:
  - Reduces skewness in the distribution
  - Accounts for diminishing marginal effects of additional years
  - Improves normality assumptions for SEM analysis
  - Captures the non-linear relationship between age and organizational outcomes

**6.2.3 Empirical Effect**

- **Path coefficient**: β = 0.02
- **Standard error**: 0.038
- **t-value**: 0.53
- **p-value**: 0.598 (non-significant)
- **95% Confidence Interval**: [−0.05, 0.09]
- **Interpretation**: Firm age does not have a significant effect on innovation performance in this sample, controlling for other variables

**6.3 IT Intensity**

**6.3.1 Definition and Rationale**

**IT Intensity** represents the extent of information technology adoption and usage within the organization, measured by the percentage of employees who regularly use computers. IT intensity is controlled because:

- IT infrastructure provides the foundation for BI system implementation
- Higher IT intensity indicates greater digital readiness
- IT usage affects the capacity to leverage data and analytics
- Prior research has shown positive associations between IT intensity and innovation

**6.3.2 Measurement and Coding**

**Original Measurement:**

- Percentage of employees who regularly use computers (continuous variable)

**Categorical Classification:**

- **Low IT Intensity**: < 30% of employees use computers (n = 98, 22.8%)
- **Medium IT Intensity**: 30–60% of employees use computers (n = 187, 43.5%)
- **High IT Intensity**: > 60% of employees use computers (n = 145, 33.7%)

**Coding Scheme:**

- Low = 1
- Medium = 2
- High = 3

**Transformation:**

- Treated as an **ordinal categorical variable** in the analysis
- No logarithmic transformation applied
- May be dummy-coded or treated as continuous in SEM depending on specification

**6.3.3 Empirical Effect**

- **Path coefficient**: β = 0.08
- **Standard error**: 0.041
- **t-value**: 1.95
- **p-value**: 0.051 (marginally non-significant)
- **95% Confidence Interval**: [−0.00, 0.16]
- **Interpretation**: IT intensity has a marginally positive effect on innovation performance, approaching but not reaching conventional significance (p = 0.051)

**6.4 Prior Innovation**

**6.4.1 Definition and Rationale**

**Prior Innovation** represents the firm's historical innovation performance or innovation track record. Prior innovation is controlled because:

- Past innovation success creates organizational capabilities and routines that facilitate future innovation
- Historical innovation performance may reflect unmeasured organizational characteristics
- Prior innovation can create path dependencies that influence current innovation outcomes
- Controlling for prior innovation strengthens causal inference by accounting for baseline innovation levels

**6.4.2 Measurement and Coding**

**Measurement Method:**

- Self-reported scale (specific items not detailed in extracted text)
- Likely measured on a 7-point Likert scale consistent with other constructs
- May capture retrospective assessment of innovation activities over a defined period (e.g., past 3 years)

**Coding:**

- Higher scores indicate greater prior innovation performance
- Treated as a continuous variable in the analysis

**Transformation:**

- No logarithmic or other mathematical transformations explicitly mentioned
- Standardization applied during structural equation modeling

**6.4.3 Empirical Effect**

- **Path coefficient**: β = 0.24
- **Standard error**: 0.045
- **t-value**: 5.33
- **p-value**: < 0.001 (highly significant)
- **95% Confidence Interval**: [0.15, 0.33]
- **Interpretation**: Prior innovation has a strong positive effect on current innovation performance, the largest effect among all control variables

**7. Interaction Term: KM × DDDM**

**7.1 Definition and Purpose**

The **interaction term (KM × DDDM)** is a multiplicative composite variable created to test the moderating effect of Data-Driven Decision Making (DDDM) Culture on the relationship between Knowledge Management (KM) Capability and Innovation Performance.

**Theoretical Rationale:** The interaction term tests Hypothesis 3 (H3), which posits that DDDM culture amplifies the positive effect of KM capability on innovation performance. Specifically:

- In firms with strong DDDM culture, knowledge management practices are more effectively translated into innovation outcomes
- DDDM culture provides the decision-making infrastructure and analytical mindset that enables knowledge to be systematically applied
- The synergistic effect of KM and DDDM creates conditions where knowledge is not only shared and absorbed but also rigorously evaluated and implemented

**7.2 Construction Method**

**7.2.1 Mean-Centering Procedure**

**Step 1: Calculate Mean Values**

- Calculate the sample mean of KM Capability: M_KM = 5.03
- Calculate the sample mean of DDDM Culture: M_DDDM = 4.58

**Step 2: Center Variables**

- For each observation i:
  - KM_centered_i = KM_i − M_KM
  - DDDM_centered_i = DDDM_i − M_DDDM

**Step 3: Create Interaction Term**

- For each observation i:
  - Interaction_i = KM_centered_i × DDDM_centered_i

**Rationale for Mean-Centering:**

1. **Reduces Multicollinearity**: Centering reduces the correlation between the interaction term and its constituent variables, improving model stability and interpretation
2. **Facilitates Interpretation**: Centered variables allow the main effects to be interpreted as the effect at the mean level of the moderator
3. **Improves Numerical Stability**: Centering reduces computational issues in maximum likelihood estimation
4. **Standard Practice**: Mean-centering is the recommended approach for creating interaction terms in regression and SEM

**7.3 Mathematical Formula**

**General Form:**

Interaction = (KM − M_KM) × (DDDM − M_DDDM)

**Expanded Form:**

KM × DDDM = (KM − 5.03) × (DDDM − 4.58)

**Example Calculation:** For a firm with KM = 6.0 and DDDM = 5.5:

KM_centered = 6.0 − 5.03 = 0.97

DDDM_centered = 5.5 − 4.58 = 0.92

Interaction = 0.97 × 0.92 = 0.89

**7.4 Interpretation of the Interaction Effect**

**7.4.1 Statistical Results**

- **Path coefficient**: β = 0.16
- **Standard error**: 0.048
- **t-value**: 3.33
- **p-value**: < 0.001 (highly significant)
- **95% Confidence Interval**: [0.07, 0.25]
- **Hypothesis**: H3 Supported

**7.4.2 Substantive Interpretation**

**Main Effect of KM (at mean DDDM):** When DDDM is at its mean level (4.58), a one-unit increase in KM capability is associated with a 0.45 standard deviation increase in innovation performance.

**Interaction Effect:** The positive interaction coefficient (β = 0.16) indicates that the effect of KM on innovation becomes stronger as DDDM culture increases. Specifically:

- For firms with **low DDDM culture** (e.g., 1 SD below mean): The effect of KM on innovation is weaker
- For firms with **average DDDM culture** (at mean): The effect of KM on innovation is moderate (β = 0.45)
- For firms with **high DDDM culture** (e.g., 1 SD above mean): The effect of KM on innovation is stronger

**Practical Implication:** Knowledge management practices are most effective in driving innovation when implemented in organizations with strong data-driven decision-making cultures. Firms seeking to maximize the innovation benefits of KM investments should simultaneously cultivate DDDM culture.

**7.5 Moderated Mediation**

The interaction term also plays a central role in testing **moderated mediation** (H4), which examines whether DDDM culture moderates the indirect effect of BI capabilities on innovation performance through KM capability.

**7.5.1 Moderated Mediation Index**

- **Index value**: 0.11
- **Standard error**: 0.034
- **p-value**: < 0.01
- **95% Confidence Interval**: [0.05, 0.18]
- **Hypothesis**: H4 Supported

**7.5.2 Interpretation**

The significant moderated mediation index indicates that:

- The indirect effect of BI on innovation through KM is **conditional** on the level of DDDM culture
- At higher levels of DDDM culture, the mediation effect is stronger
- DDDM culture amplifies the mechanism through which BI capabilities enhance innovation via knowledge management

**Conditional Indirect Effects:**

- **Low DDDM** (−1 SD): Weaker indirect effect of BI → KM → Innovation
- **Mean DDDM**: Moderate indirect effect (β = 0.30)
- **High DDDM** (+1 SD): Stronger indirect effect of BI → KM → Innovation

**8. Coding Schemes**

**8.1 Likert Scale Coding**

All primary constructs (BI Capabilities, KM Capability, Innovation Performance, DDDM Culture) were measured using a **7-point Likert scale**.

**8.1.1 Standard Likert Scale**

1 = Strongly Disagree

2 = Disagree

3 = Somewhat Disagree

4 = Neither Agree nor Disagree (Neutral)

5 = Somewhat Agree

6 = Agree

7 = Strongly Agree

**8.1.2 Coding Properties**

- **Scale Type**: Interval scale (treated as continuous in SEM)
- **Range**: 1 to 7
- **Midpoint**: 4 (neutral)
- **Direction**: Higher values indicate stronger agreement/higher levels of the construct
- **Missing Values**: Handling procedures not explicitly detailed in extracted text

**8.1.3 Composite Score Calculation**

For each construct, composite scores were calculated as:

Composite Score = (Item1 + Item2 + ... + ItemN) / N

Where N is the number of items in the construct.

**Example for BI Capabilities (12 items):**

BI_Composite = (Item1 + Item2 + ... + Item12) / 12

**8.2 Categorical Variable Coding**

**8.2.1 Firm Size Categories**

**Original Categories:**

- Micro: < 10 employees
- Small: 10–49 employees
- Medium: 50–249 employees

**Coding Options:**

**Option 1: Dummy Coding (Reference Category: Micro)**

Small_Dummy = 1 if Small, 0 otherwise

Medium_Dummy = 1 if Medium, 0 otherwise

**Option 2: Effect Coding**

Small_Effect = 1 if Small, −1 if Micro, 0 if Medium

Medium_Effect = 1 if Medium, −1 if Micro, 0 if Small

**Option 3: Continuous (Log-Transformed)**

Firm_Size_Log = ln(Number of Employees)

*This is the approach used in the study.*

**8.2.2 Firm Age Categories**

**Original Categories:**

- < 10 years
- 10–20 years
- 21–30 years
- 30 years

**Coding Approach:**

- **Continuous (Log-Transformed)**: Firm_Age_Log = ln(Years Since Establishment)
- *This is the approach used in the study.*

**8.2.3 IT Intensity Categories**

**Original Categories:**

- Low: < 30% employees use computers
- Medium: 30–60% employees use computers
- High: > 60% employees use computers

**Coding Options:**

**Option 1: Ordinal Coding**

Low = 1

Medium = 2

High = 3

*This approach treats IT intensity as a continuous variable with equal intervals.*

**Option 2: Dummy Coding (Reference Category: Low)**

Medium_IT = 1 if Medium, 0 otherwise

High_IT = 1 if High, 0 otherwise

**Option 3: Continuous**

IT_Intensity = Percentage of employees using computers (0–100)

*The study likely used Option 1 (ordinal coding) or Option 3 (continuous percentage).*

**8.3 Logarithmic Transformation Formula**

Logarithmic transformations were applied to **Firm Size** and **Firm Age** to address skewness and improve model fit.

**8.3.1 Natural Logarithm Formula**

Transformed_Variable = ln(Original_Variable)

Where:

- ln = natural logarithm (base e)
- e ≈ 2.71828

**8.3.2 Application to Firm Size**

Firm_Size_Log = ln(Number_of_Employees)

**Example Calculations:**

- Micro firm with 5 employees: ln(5) = 1.61
- Small firm with 25 employees: ln(25) = 3.22
- Medium firm with 100 employees: ln(100) = 4.61

**Interpretation:** A one-unit increase in log(Firm Size) represents an e-fold (approximately 2.72-fold) increase in the number of employees. Alternatively, the coefficient can be interpreted as the effect of a 1% increase in firm size (approximately).

**8.3.3 Application to Firm Age**

Firm_Age_Log = ln(Years_Since_Establishment)

**Example Calculations:**

- Young firm (5 years): ln(5) = 1.61
- Established firm (15 years): ln(15) = 2.71
- Mature firm (25 years): ln(25) = 3.22
- Veteran firm (40 years): ln(40) = 3.69

**Interpretation:** Similar to firm size, a one-unit increase in log(Firm Age) represents an e-fold increase in years. The logarithmic transformation captures diminishing marginal effects of additional years.

**8.3.4 Handling Zero or Negative Values**

**Issue:** The natural logarithm is undefined for zero or negative values.

**Solutions:**

1. **Add a constant**: ln(Variable + 1) — ensures all values are positive
2. **Exclude zero values**: Remove observations with zero values (if theoretically appropriate)
3. **Use alternative transformation**: Square root or inverse hyperbolic sine transformation

*For Firm Size and Firm Age, zero values are theoretically impossible (all firms have at least 1 employee and positive age), so this issue does not arise in this study.*

**8.4 Interaction Term Construction**

**8.4.1 Mean-Centering Formula**

Variable_Centered = Variable − Mean(Variable)

**For KM Capability:**

KM_Centered = KM − 5.03

**For DDDM Culture:**

DDDM_Centered = DDDM − 4.58

**8.4.2 Multiplication Formula**

Interaction = Variable1_Centered × Variable2_Centered

**For KM × DDDM:**

KM_DDDM_Interaction = (KM − 5.03) × (DDDM − 4.58)

**8.4.3 Properties of the Interaction Term**

- **Mean**: Approximately zero (due to centering)
- **Interpretation**: Represents the synergistic effect of KM and DDDM beyond their individual effects
- **Multicollinearity**: Reduced through centering (compared to uncentered interaction)

**8.5 Standardization in SEM**

In structural equation modeling, variables are often **standardized** to facilitate interpretation and comparison of path coefficients.

**8.5.1 Standardization Formula**

Z = (X − Mean(X)) / SD(X)

Where:

- Z = standardized variable (z-score)
- X = original variable
- Mean(X) = sample mean
- SD(X) = sample standard deviation

**8.5.2 Properties of Standardized Variables**

- **Mean**: 0
- **Standard Deviation**: 1
- **Interpretation**: Values represent the number of standard deviations from the mean

**8.5.3 Standardized Path Coefficients**

All path coefficients reported in the study (β values) are **standardized coefficients**, which:

- Represent the change in the dependent variable (in standard deviations) for a one-standard-deviation change in the independent variable
- Allow direct comparison of effect sizes across different variables
- Range theoretically from −1 to +1 (though values near ±1 are rare in practice)

**Example Interpretation:**

- β = 0.67 (BI → KM): A one-standard-deviation increase in BI capabilities is associated with a 0.67 standard-deviation increase in KM capability
- β = 0.28 (BI → Innovation): A one-standard-deviation increase in BI capabilities is associated with a 0.28 standard-deviation increase in innovation performance

**9. Descriptive Statistics Table**

**Table 1: Construct Reliability, Validity, and Descriptive Statistics**

| **Construct** | **Number of Items** | **Cronbach's α** | **Composite Reliability (CR)** | **AVE** | **Mean** | **SD** |
| --- | --- | --- | --- | --- | --- | --- |
| **BI Capabilities** | 12 | 0.93 | 0.94 | 0.68 | 4.82 | 1.24 |
| — Data Capture | 4 | 0.89 | 0.90 | 0.69 | 4.91 | 1.31 |
| — Analytics | 4 | 0.91 | 0.92 | 0.74 | 4.68 | 1.29 |
| — Interpretation | 4 | 0.90 | 0.91 | 0.71 | 4.87 | 1.26 |
| **KM Capability** | 10 | 0.92 | 0.93 | 0.66 | 5.03 | 1.18 |
| — Knowledge Sharing | 5 | 0.90 | 0.91 | 0.67 | 5.12 | 1.22 |
| — Absorptive Capacity | 5 | 0.89 | 0.90 | 0.64 | 4.94 | 1.21 |
| **Innovation Performance** | 8 | 0.94 | 0.95 | 0.70 | 4.76 | 1.33 |
| — Product Innovation | 4 | 0.92 | 0.93 | 0.73 | 4.69 | 1.38 |
| — Process Innovation | 4 | 0.91 | 0.92 | 0.74 | 4.83 | 1.35 |
| **DDDM Culture** | 6 | 0.91 | 0.92 | 0.68 | 4.58 | 1.41 |

**Notes:**

- All constructs measured on a 7-point Likert scale (1 = Strongly Disagree, 7 = Strongly Agree)
- Cronbach's α > 0.70 indicates acceptable reliability; all constructs exceed this threshold
- Composite Reliability (CR) > 0.70 indicates acceptable reliability; all constructs exceed this threshold
- Average Variance Extracted (AVE) > 0.50 indicates adequate convergent validity; all constructs exceed this threshold
- Mean values range from 4.58 to 5.12, indicating moderate to moderately high levels across all constructs
- Standard deviations range from 1.18 to 1.41, indicating reasonable variability in responses
- Sample size: N = 430 manufacturing SMEs

**Interpretation of Descriptive Statistics**

**9.1 Central Tendency (Means)**

- **KM Capability** has the highest mean (5.03), suggesting that manufacturing SMEs in the sample report relatively strong knowledge management practices
- **DDDM Culture** has the lowest mean (4.58), indicating that data-driven decision-making culture is less developed compared to other capabilities
- **BI Capabilities** (4.82) and **Innovation Performance** (4.76) fall in the middle range, suggesting moderate levels
- All means are above the scale midpoint (4.0), indicating generally positive assessments across all constructs

**9.2 Variability (Standard Deviations)**

- **DDDM Culture** shows the highest variability (SD = 1.41), suggesting substantial differences among firms in their data-driven cultures
- **Innovation Performance** also shows high variability (SD = 1.33), indicating diverse innovation outcomes across the sample
- **KM Capability** shows the lowest variability (SD = 1.18), suggesting more homogeneity in knowledge management practices
- All standard deviations are substantial relative to the 7-point scale, indicating good discriminatory power

**9.3 Reliability Assessment**

- All Cronbach's α values exceed 0.89, indicating **excellent internal consistency**
- All Composite Reliability values exceed 0.90, confirming **strong reliability**
- The highest reliability is observed for Innovation Performance (α = 0.94, CR = 0.95)
- Even the sub-dimensions show strong reliability (α range: 0.89–0.92)

**9.4 Validity Assessment**

- All AVE values exceed 0.64, well above the 0.50 threshold, indicating **strong convergent validity**
- The highest AVE is for Analytics capability (0.74), suggesting that items strongly converge on this dimension
- The lowest AVE is for Absorptive Capacity (0.64), still indicating adequate convergent validity
- Overall, the measurement model demonstrates robust psychometric properties

**10. Correlation Matrix**

**Table 2: Descriptive Statistics and Correlation Matrix**

| **Construct** | **1** | **2** | **3** | **4** | **5** | **6** | **7** | **8** |
| --- | --- | --- | --- | --- | --- | --- | --- | --- |
| 1. BI Capabilities | **(0.82)** |  |  |  |  |  |  |  |
| 2. KM Capability | 0.64*** | **(0.81)** |  |  |  |  |  |  |
| 3. Innovation Performance | 0.58*** | 0.67*** | **(0.84)** |  |  |  |  |  |
| 4. DDDM Culture | 0.61*** | 0.59*** | 0.54*** | **(0.82)** |  |  |  |  |
| 5. Firm Size (log) | 0.23*** | 0.19*** | 0.21*** | 0.18*** | — |  |  |  |
| 6. Firm Age (log) | 0.08 | 0.11* | 0.09 | 0.06 | 0.34*** | — |  |  |
| 7. IT Intensity | 0.47*** | 0.38*** | 0.32*** | 0.44*** | 0.29*** | 0.07 | — |  |
| 8. Prior Innovation | 0.41*** | 0.46*** | 0.52*** | 0.38*** | 0.16** | 0.13** | 0.24*** | — |

**Notes:**

- N = 430 manufacturing SMEs
- Values in parentheses on the diagonal represent the square root of Average Variance Extracted (AVE)
  - p < 0.05; ** p < 0.01; *** p < 0.001 (two-tailed tests)
- All correlations are Pearson correlation coefficients
- Firm Size and Firm Age are log-transformed
- IT Intensity is coded as ordinal (1 = Low, 2 = Medium, 3 = High) or continuous percentage
- Prior Innovation is measured on a self-reported scale****

**Interpretation of Correlation Matrix**

**10.1 Discriminant Validity Assessment**

**Fornell-Larcker Criterion:** Discriminant validity is established when the square root of AVE (diagonal values in parentheses) exceeds all correlations in the corresponding row and column.

**Assessment:**

- **BI Capabilities** (√AVE = 0.82): Exceeds all correlations (highest is 0.64 with KM) ✓
- **KM Capability** (√AVE = 0.81): Exceeds all correlations (highest is 0.67 with Innovation) ✓
- **Innovation Performance** (√AVE = 0.84): Exceeds all correlations (highest is 0.67 with KM) ✓
- **DDDM Culture** (√AVE = 0.82): Exceeds all correlations (highest is 0.61 with BI) ✓

**Conclusion:** All constructs demonstrate adequate discriminant validity according to the Fornell-Larcker criterion.

**10.2 Relationships Among Main Constructs**

**Strong Positive Correlations (r > 0.50):**

1. **KM ↔ Innovation** (r = 0.67***): Strongest correlation, suggesting that knowledge management capability is closely associated with innovation performance
2. **BI ↔ KM** (r = 0.64***): Strong relationship, supporting the hypothesized path from BI to KM
3. **BI ↔ DDDM** (r = 0.61***): Strong correlation, indicating that BI capabilities and DDDM culture tend to co-occur
4. **KM ↔ DDDM** (r = 0.59***): Strong relationship, suggesting that knowledge management and data-driven culture are complementary
5. **BI ↔ Innovation** (r = 0.58***): Strong correlation, supporting the direct effect hypothesis
6. **DDDM ↔ Innovation** (r = 0.54***): Moderate-to-strong correlation, consistent with the moderating role of DDDM

**Interpretation:**

- All main constructs are significantly and positively intercorrelated
- Correlations are substantial but not excessively high (all < 0.70), suggesting distinct constructs
- The pattern of correlations is consistent with the hypothesized model structure

**10.3 Relationships with Control Variables**

**Firm Size (log):**

- Weak-to-moderate positive correlations with all main constructs (r = 0.18*** to 0.23***)
- Strongest correlation with BI Capabilities (r = 0.23***), suggesting larger firms have greater BI capabilities
- Moderate correlation with IT Intensity (r = 0.29***), as expected
- Strong correlation with Firm Age (r = 0.34***), indicating that larger firms tend to be older***

**Firm Age (log):**

- Weak correlations with main constructs (r = 0.06 to 0.11*)
- Only significant correlation is with KM Capability (r = 0.11*, p < 0.05)
- Non-significant correlations with Innovation Performance (r = 0.09) and DDDM Culture (r = 0.06)
- This pattern is consistent with the non-significant effect of Firm Age on Innovation in the structural model

**IT Intensity:**

- Moderate-to-strong positive correlations with all main constructs (r = 0.32*** to 0.47***)
- Strongest correlation with BI Capabilities (r = 0.47***), as expected (IT infrastructure supports BI)
- Strong correlation with DDDM Culture (r = 0.44***), suggesting IT intensity facilitates data-driven culture
- Moderate correlations with KM (r = 0.38***) and Innovation (r = 0.32***)

**Prior Innovation:**

- Moderate-to-strong positive correlations with all main constructs (r = 0.38*** to 0.52***)
- Strongest correlation with Innovation Performance (r = 0.52***), indicating path dependency in innovation
- Strong correlations with KM (r = 0.46***) and BI (r = 0.41***), suggesting that innovative firms develop these capabilities
- This pattern justifies the inclusion of Prior Innovation as a control variable***

**10.4 Multicollinearity Assessment**

**Concern:** High correlations among predictors can cause multicollinearity, inflating standard errors and reducing statistical power.

**Assessment:**

- Highest correlation among main constructs: r = 0.67 (KM ↔ Innovation)
- Highest correlation among predictors: r = 0.64 (BI ↔ KM)
- Rule of thumb: Correlations < 0.80–0.90 are generally acceptable

**Conclusion:**

- No evidence of severe multicollinearity among main constructs
- All correlations are below the 0.70 threshold, suggesting acceptable levels
- Variance Inflation Factors (VIFs) would provide more definitive assessment (not reported in extracted text)

**10.5 Common Method Bias Assessment**

**Concern:** When all variables are measured using the same method (self-report survey), common method variance may inflate correlations.

**Preliminary Assessment:**

- Correlations are substantial but not excessively high (all < 0.70)
- Discriminant validity is established (√AVE > correlations)
- These patterns suggest that common method bias, if present, is not severe

**Note:** The study mentions addressing common method bias, but specific test results (e.g., Harman's single-factor test, common latent factor method) are not detailed in the extracted text.

**10.6 Support for Hypothesized Relationships**

The correlation matrix provides preliminary support for the hypothesized relationships:

1. **H1 (BI → Innovation):** Supported by r = 0.58*** (strong positive correlation)
2. **H2 (BI → KM → Innovation):** Supported by:
   - r(BI, KM) = 0.64*** (strong)
   - r(KM, Innovation) = 0.67*** (strong)
   - r(BI, Innovation) = 0.58*** (moderate, suggesting partial mediation)
3. **H3 (KM × DDDM → Innovation):** Preliminary support from:
   - r(KM, Innovation) = 0.67***
   - r(DDDM, Innovation) = 0.54***
   - Interaction effect requires SEM testing (not visible in bivariate correlations)
4. **H4 (Moderated Mediation):** Requires advanced testing beyond correlation analysis

**Conclusion:** The correlation matrix provides strong preliminary evidence for the hypothesized relationships, which are formally tested in the structural equation model.

**Summary**

This document provides comprehensive details on all variables used in the study "Can Business Intelligence Make Small Businesses More Innovative?" The research employs a sophisticated moderated mediation model with:

- **12-item BI Capabilities** construct (α = 0.93) as the independent variable
- **10-item KM Capability** construct (α = 0.92) as the mediating variable
- **8-item Innovation Performance** construct (α = 0.94) as the dependent variable
- **6-item DDDM Culture** construct (α = 0.91) as the moderating variable
- **Four control variables** (Firm Size, Firm Age, IT Intensity, Prior Innovation)
- **One interaction term** (KM × DDDM) for testing moderated mediation

All constructs demonstrate excellent psychometric properties, with Cronbach's α values exceeding 0.89, composite reliability values exceeding 0.90, and AVE values exceeding 0.64. The correlation matrix reveals strong positive relationships among main constructs while maintaining adequate discriminant validity.

The coding schemes include 7-point Likert scales for all primary constructs, logarithmic transformations for Firm Size and Firm Age, and mean-centering for interaction term construction. The descriptive statistics and correlation matrix provide robust evidence for the reliability, validity, and theoretical coherence of the measurement model.
